# Supplementary material for: Iodine-catalyzed synthesis of benzoxazoles using catechols, ammonium acetate, and alkenes/alkynes/ketones via C–C and C–O bond cleavage
Source: Royal Society of Chemistry journal article supplement (doi:10.1039/d2ra03340b), 2022-01-01
Supplement: d2ra03340b1.pdf [file d2ra03340b1.pdf]

## Supporting Information

| <b>Table of Contents</b>            |             |
|-------------------------------------|-------------|
| <b>Contents</b>                     | <b>Page</b> |
| Experimental section                | S3          |
| Table 1S                            | S4          |
| Table 2S                            | S4          |
| Table 3S                            | S5          |
| Product characterization data       | S6-14       |
| References                          | S15         |
| Copy of NMR spectra of benzoxazoles | S16-41      |

## Experimental section

**General Information.** All reagents and solvents were obtained from commercial sources. All known products were identified by comparing of their physical characteristics and spectral data with those in the valid samples.  $^1\text{H}$  NMR (250, 300, 400 MHz) and  $^{13}\text{C}$  NMR (62.5, 75, 100 MHz), spectra were recorded on Bruker Avance DRX. Melting points were checked by a Büchi B-545 apparatus in open capillary tubes. All reactions were monitored by thin-layer chromatography (TLC) using silica gel plates (silica gel 60 F254 Merck chemical company).

### General experimental procedure for the synthesis of 2-aryl benzoxazoles *via* alkene/alkyne/ketone

Sequentially, to a round-bottomed flask (equipped air condensation), the reaction was carried out with catechol (1.0 mmol), ammonium acetate (1.2 mmol), alkene/alkyne/ketone (1.0 mmol), and  $\text{I}_2$  (10 mol %) in DMSO (5.0 mL) heated at 150 °C (oil bath) for the appropriate time. Then, the resulting mixture was cooled to room temperature and extracted with ethyl acetate. Afterward, the combined organic layer was washed with saturated  $\text{Na}_2\text{S}_2\text{O}_3$  and brine. Next, dried over anhydrous  $\text{Na}_2\text{SO}_4$ , and concentrated under reduced pressure. Finally, the crude mixtures were purified by column chromatography using eluent to afford the corresponding the pure 2-aryl benzoxazoles 4.

**Table S1.** Investigation of different type of solvent.<sup>a</sup>

| Entry    | Catalyst (mol %)          | Solvent     | Temp.         | Yield % <sup>b</sup> |
|----------|---------------------------|-------------|---------------|----------------------|
| 1        | I <sub>2</sub> (10)       | DMSO        | 140 °C        | 75                   |
| 2        | I <sub>2</sub> (10)       | DMF         | 140 °C        | 30                   |
| 3        | I <sub>2</sub> (10)       | Toluene     | 140 °C        | -                    |
| 4        | I <sub>2</sub> (10)       | Xylene      | 140 °C        | -                    |
| 5        | I <sub>2</sub> (10)       | PEG         | 140 °C        | -                    |
| <b>6</b> | <b>I<sub>2</sub> (10)</b> | <b>DMSO</b> | <b>150 °C</b> | <b>92</b>            |

<sup>a</sup>General conditions: 3,5-di-*tert*-butylbenzene-1,2-diol (1.0 mmol), ammonium acetate (1.2 mmol), acetophenone (1.0 mmol), solvent (5.0 mL), open air, 12h. <sup>b</sup>Isolated yield.

**Table S2.** Iodine sources were employed in the reaction.<sup>a</sup>

| Entry    | Catalyst ( mol %)         | Solvent     | Temp.         | Yield % <sup>b</sup> |
|----------|---------------------------|-------------|---------------|----------------------|
| 1        | I <sub>2</sub> (10)       | DMSO        | 140 °C        | 75                   |
| 2        | TBAI (10)                 | DMSO        | 140 °C        | 0                    |
| 3        | AgI (10)                  | DMSO        | 140 °C        | 10                   |
| 4        | CuI (10)                  | DMSO        | 140 °C        | 20                   |
| 5        | KIO <sub>4</sub> (10)     | DMSO        | 140 °C        | 35                   |
| 6        | KI (10)                   | DMSO        | 140 °C        | 5                    |
| <b>7</b> | <b>I<sub>2</sub> (10)</b> | <b>DMSO</b> | <b>150 °C</b> | <b>92</b>            |

<sup>a</sup>General conditions: 3,5-di-*tert*-butylbenzene-1,2-diol (1.0 mmol), ammonium acetate (1.2 mmol), acetophenone (1.0 mmol), DMSO (5.0 mL), open air, 12h. <sup>b</sup>Isolated yield.

**Table S3.** Various sources of ammonia in the reaction.<sup>a</sup>

| Entry | Catalyst (mol %)    | Ammonia source                                  | Solvent | Temp.  | Yield % <sup>b</sup> |
|-------|---------------------|-------------------------------------------------|---------|--------|----------------------|
| 1     | I <sub>2</sub> (10) | NH <sub>4</sub> OAc                             | DMSO    | 150 °C | 92                   |
| 2     | I <sub>2</sub> (10) | (NH <sub>4</sub> ) <sub>2</sub> CO <sub>3</sub> | DMSO    | 150 °C | 30                   |
| 3     | I <sub>2</sub> (10) | (NH <sub>4</sub> ) <sub>2</sub> SO <sub>4</sub> | DMSO    | 150 °C | 35                   |
| 4     | I <sub>2</sub> (10) | Bu <sub>4</sub> NOH                             | DMSO    | 150 °C | 0                    |
| 5     | I <sub>2</sub> (10) | NH <sub>4</sub> OH                              | DMSO    | 150 °C | 50                   |
| 6     | I <sub>2</sub> (10) | NH <sub>4</sub> Cl                              | DMSO    | 150 °C | 60                   |
| 7     | I <sub>2</sub> (10) | NH <sub>4</sub> CN                              | DMSO    | 150 °C | 20                   |
| 8     | I <sub>2</sub> (10) | NH <sub>4</sub> SCN                             | DMSO    | 150 °C | 45                   |

<sup>a</sup>General conditions: 3,5-di-*tert*-butylbenzene-1,2-diol (1.0 mmol), ammonia sources (1.2 mmol), acetophenone (1.0 mmol), DMSO (5.0 mL), open air, 12h. <sup>b</sup>Isolated yield.

**5,7-Di-*tert*-butyl-2-phenylbenzo[*d*]oxazole (4a).<sup>1</sup>**

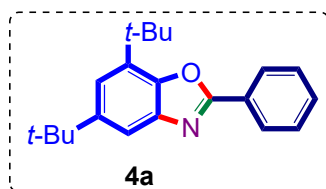

**Yield:** 92% (282 mg); Brown liquid; Purified by column chromatography (petroleum ether/ethyl acetate 100/1).

**<sup>1</sup>H NMR (300 MHz, CDCl<sub>3</sub>):**  $\delta$  (ppm) 8.29 (s, 2H), 7.70 (s, 1H), 7.56 (s, 3H), 7.33 (s, 1H), 1.58 (s, 9H), 1.42 (s, 9H); **<sup>13</sup>C{H}**

**NMR (75 MHz, CDCl<sub>3</sub>):**  $\delta$  (ppm) 162.5, 147.7, 146.9, 142.3, 133.7, 131.2, 128.9, 127.5, 127.4, 119.6, 114.2, 35.1, 34.5, 31.8, 30.0; **Anal. Calcd for C<sub>21</sub>H<sub>25</sub>NO:** C, 82.04; H, 8.20; N, 4.56; Found: C, 81.90; H, 8.08; N, 4.43.

**5,7-Di-*tert*-butyl-2-(4-bromophenyl)benzo[*d*]oxazole (4b).<sup>2</sup>**

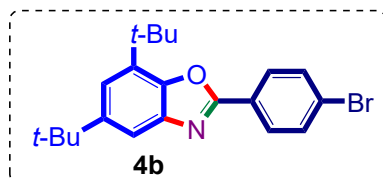

**Yield:** 92% (355 mg); Colorless liquid; Purified by column chromatography (petroleum ether/ethyl acetate 100/1).

**<sup>1</sup>H NMR (250 MHz, CDCl<sub>3</sub>):**  $\delta$  (ppm) 8.03 (d, *J* = 7.5 Hz, 2H), 7.59-7.55 (m, 3H), 7.24 (d, *J* = 2.5 Hz, 1H), 1.46 (s, 9H), 1.31

(s, 9H); **<sup>13</sup>C{H} NMR (100 MHz, CDCl<sub>3</sub>):**  $\delta$  (ppm) 161.6, 148.0, 147.0, 142.2, 133.8, 132.2, 128.8, 126.5, 125.8, 119.9, 114.3, 35.1, 34.5, 31.8, 30.0; **Anal. Calcd for C<sub>21</sub>H<sub>24</sub>BrNO:** C, 65.29; H, 6.26; N, 3.63; Found: C, 65.05; H, 6.10; N, 3.76.

**5,7-Di-*tert*-butyl-2-(4-chlorophenyl)benzo[*d*]oxazole (4c).<sup>3</sup>**

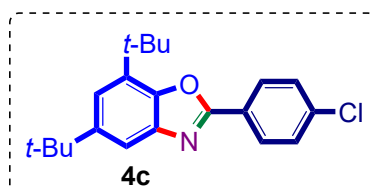

**Yield:** 94% (321 mg); Colorless liquid; Purified by column chromatography (petroleum ether/ethyl acetate 100/1).

**<sup>1</sup>H NMR (400 MHz, CDCl<sub>3</sub>):**  $\delta$  (ppm) 8.10 (d, *J* = 8.0 Hz, 2H), 7.56 (d, *J* = 4.0 Hz, 1H), 7.41 (d, *J* = 12.0 Hz, 2H), 7.24 (d, *J* =

4.0 Hz, 1H), 1.46 (s, 9H), 1.31 (s, 9H); **<sup>13</sup>C{H} NMR (100 MHz, CDCl<sub>3</sub>):**  $\delta$  (ppm) 161.5, 147.9, 146.9, 142.2, 137.3, 133.8, 129.2, 128.6, 126.0, 119.8, 114.3, 35.1, 34.5, 31.8, 30.0; **Anal. Calcd for C<sub>21</sub>H<sub>24</sub>ClNO:** C, 73.78; H, 7.08; N, 4.10; Found: C, 73.64; H, 6.91; N, 4.21.

**5,7-Di-*tert*-butyl-2-(4-fluorophenyl)benzo[*d*]oxazole (4d).<sup>1</sup>**

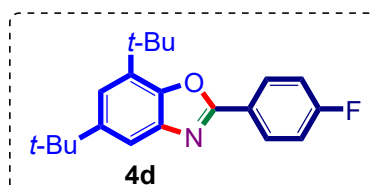

**Yield:** 89% (289 mg); Colorless liquid; Purified by column chromatography (petroleum ether/ethyl acetate 100/1).

**<sup>1</sup>H NMR (400 MHz, CDCl<sub>3</sub>):**  $\delta$  (ppm) 8.27 (dd,  $J = 8.0, 4.0$  Hz, 2H), 7.67 (d,  $J = 4.0$  Hz, 1H), 7.33 (d,  $J = 4.0$  Hz, 1H), 7.24 (t,  $J = 8.0$  Hz, 2H), 1.57 (s, 9H), 1.42 (s, 9H); **<sup>13</sup>C{H} NMR (100 MHz, CDCl<sub>3</sub>):**  $\delta$  (ppm) 164.6 (d,  $J_{C-F} = 250.0$  Hz), 161.6, 147.8, 146.9, 142.2, 133.7, 129.5 (d,  $J_{C-F} = 8.0$  Hz), 123.8 (d,  $J_{C-F} = 3.0$  Hz), 119.6, 116.1 (d,  $J_{C-F} = 22.0$  Hz), 114.2, 35.1, 34.5, 31.8, 30.0; **Anal. Calcd for C<sub>21</sub>H<sub>24</sub>FNO:** C, 77.51; H, 7.43; N, 4.30; Found: C, 77.39; H, 7.31; N, 4.40.

**4-(5,7-Di-*tert*-butylbenzo[d]oxazol-2-yl)benzonitrile (4e).**<sup>1</sup>

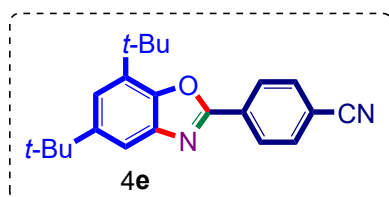

**Yield:** 85% (282 mg); Colorless liquid; Purified by column chromatography (petroleum ether/ethyl acetate 100/1).

**<sup>1</sup>H NMR (300 MHz, CDCl<sub>3</sub>):**  $\delta$  (ppm) 8.28 (d,  $J = 9.0$  Hz, 2H), 7.75 (d,  $J = 9.0$  Hz, 2H), 7.60 (d,  $J = 3.0$  Hz, 1H), 7.30 (d,  $J = 3.0$  Hz, 1H), 1.48 (s, 9H), 1.33 (s, 9H); **<sup>13</sup>C{H} NMR (75 MHz, CDCl<sub>3</sub>):**  $\delta$  (ppm) 160.3, 148.4, 147.1, 142.1, 134.0, 132.7, 131.5, 127.7, 120.7, 118.3, 114.6, 114.3, 35.1, 34.5, 31.7, 30.0; **Anal. Calcd for C<sub>22</sub>H<sub>24</sub>N<sub>2</sub>O:** C, 79.48; H, 7.28; N, 8.43; Found: C, 79.11; H, 7.06; N, 8.30.

**5,7-Di-*tert*-butyl-2-(4-methoxyphenyl)benzo[d]oxazole (4f).**<sup>4</sup>

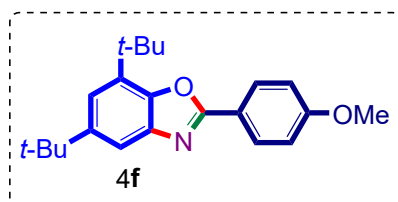

**Yield:** 91% (307 mg); Colorless liquid; Purified by column chromatography (petroleum ether/ethyl acetate 100/1).

**<sup>1</sup>H NMR (300 MHz, CDCl<sub>3</sub>):**  $\delta$  (ppm) 8.10 (d,  $J = 9.0$  Hz, 2H), 7.53 (d,  $J = 3.0$  Hz, 1H), 7.18 (d,  $J = 3.0$  Hz, 1H), 7.93 (d,  $J = 9.0$  Hz, 2H), 3.76 (s, 3H), 1.45 (s, 9H), 1.30 (s, 9H); **<sup>13</sup>C{H} NMR (75 MHz, CDCl<sub>3</sub>):**  $\delta$  (ppm) 162.6, 162.1, 147.5, 146.8, 142.4, 133.5, 129.1, 120.1, 119.0, 114.3, 113.9, 55.4, 35.0, 34.4, 31.8, 30.0; **Anal. Calcd for C<sub>22</sub>H<sub>27</sub>NO<sub>2</sub>:** C, 78.30; H, 8.06; N, 4.15; Found: C, 78.16; H, 8.12; N, 4.23.

**5,7-Di-*tert*-butyl-2-(*p*-tolyl)benzo[d]oxazole (4g).**<sup>5</sup>

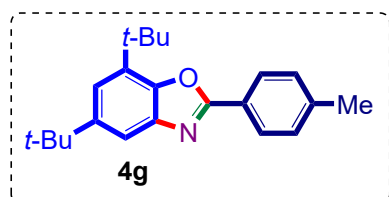

**Yield:** 93% (298 mg); Colorless liquid; Purified by column chromatography (petroleum ether/ethyl acetate 100/1).

**<sup>1</sup>H NMR (400 MHz, CDCl<sub>3</sub>):**  $\delta$  (ppm) 8.06 (d,  $J = 8.0$  Hz, 2H), 7.57 (d,  $J = 4.0$  Hz, 1H), 7.25 (d,  $J = 8.0$  Hz, 2H), 7.21 (d,  $J = 4.0$  Hz, 1H), 2.36 (s, 3H), 1.47 (s, 9H), 1.32 (s, 9H); **<sup>13</sup>C{H} NMR (100 MHz, CDCl<sub>3</sub>):**  $\delta$  (ppm) 162.7, 147.6, 146.8, 142.3,

141.6, 133.6, 129.6, 127.3, 124.8, 119.3, 114.1, 35.1, 34.5, 31.8, 30.0, 21.6; **Anal. Calcd for C<sub>22</sub>H<sub>27</sub>NO**: C, 82.20; H, 8.47; N, 4.36; Found: C, 82.09; H, 8.40; N, 4.42.

**5,7-Di-*tert*-butyl-2-(4-(*tert*-butyl)phenyl)benzo[*d*]oxazole (4h).**<sup>2</sup>

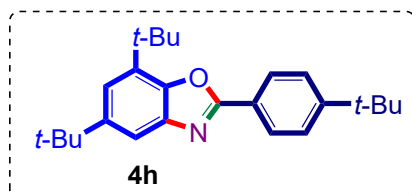

**Yield:** 94% (341 mg); Colorless liquid; Purified by column chromatography (petroleum ether/ethyl acetate 100/1).

**<sup>1</sup>H NMR (250 MHz, CDCl<sub>3</sub>):**  $\delta$  (ppm) 8.11 (d,  $J$  = 10.0 Hz, 2H), 7.58 (d,  $J$  = 2.5 Hz, 1H), 7.47 (d,  $J$  = 7.5 Hz, 2H), 7.21 (d,  $J$  = 2.5 Hz, 1H), 1.47 (s, 9H), 1.32 (s, 9H), 1.30 (s, 9H); **<sup>13</sup>C{H} NMR (100 MHz, CDCl<sub>3</sub>):**  $\delta$  (ppm) 162.6, 154.7, 147.6, 146.8, 142.3, 133.6, 127.2, 125.9, 124.7, 119.3, 114.1, 35.1, 35.0, 34.5, 31.8, 31.2, 30.0; **Anal. Calcd for C<sub>25</sub>H<sub>33</sub>NO**: C, 82.60; H, 9.15; N, 3.85; Found: C, 82.49; H, 9.04; N, 3.94.

**2-([1,1'-Biphenyl]-4-yl)-5,7-di-*tert*-butylbenzo[*d*]oxazole (4i).**

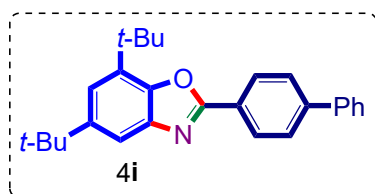

**Yield:** 85% (326 mg); Pale brown liquid; Purified by column chromatography (petroleum ether/ethyl acetate 100/1).

**<sup>1</sup>H NMR (400 MHz, CDCl<sub>3</sub>):**  $\delta$  (ppm) 8.35 (d,  $J$  = 8.0 Hz, 2H), 7.79 (d,  $J$  = 8.0 Hz, 2H), 7.71-7.68 (m, 3H), 7.52 (t,  $J$  = 8.0 Hz, 2H), 7.45-7.41 (m, 1H), 7.35 (d,  $J$  = 4.0 Hz, 1H), 1.60 (s, 9H), 1.43 (s, 9H); **<sup>13</sup>C{H} NMR (100 MHz, CDCl<sub>3</sub>):**  $\delta$  (ppm) 162.3, 147.8, 146.9, 144.0, 140.1, 133.7, 128.9, 128.0, 127.9, 127.6, 127.1, 126.2, 119.6, 114.1, 35.1, 34.5, 31.8, 30.0; **Anal. Calcd for C<sub>27</sub>H<sub>29</sub>NO**: C, 84.55; H, 7.62; N, 3.65; Found: C, 84.42; H, 7.50; N, 3.57.

**2-(3-Bromophenyl)-5,7-di-*tert*-butylbenzo[*d*]oxazole (4j).**<sup>5</sup>

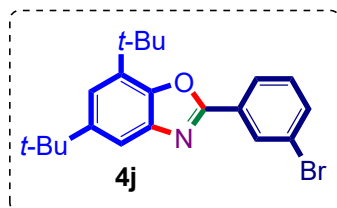

**Yield:** 87% (336 mg); Pale green solid; Purified by column chromatography (petroleum ether/ethyl acetate 100/1).

**<sup>1</sup>H NMR (400 MHz, CDCl<sub>3</sub>):**  $\delta$  (ppm) 8.40 (d,  $J$  = 4.0 Hz, 1H), 8.20 (d,  $J$  = 8.0 Hz, 1H), 7.67 (d,  $J$  = 4.0 Hz, 1H), 7.66 (s, 1H), 7.42 (t,  $J$  = 8.0 Hz, 1H), 7.35 (d,  $J$  = 4.0 Hz, 1H), 1.58 (s, 9H), 1.42 (s, 9H); **<sup>13</sup>C{H} NMR (100 MHz, CDCl<sub>3</sub>):**  $\delta$  (ppm) 160.9, 148.0, 147.0, 142.1, 134.1, 133.9, 130.4, 130.2, 129.4, 125.9, 123.0, 120.0, 114.3, 35.1, 34.5, 31.8, 30.0; **Anal. Calcd for C<sub>21</sub>H<sub>24</sub>BrNO**: C, 65.29; H, 6.26; N, 3.63; Found: C, 65.15; H, 6.07; N, 3.42.



**5,7-Di-tert-butyl-2-(3-methoxyphenyl)benzo[d]oxazole (4k).**<sup>3</sup>

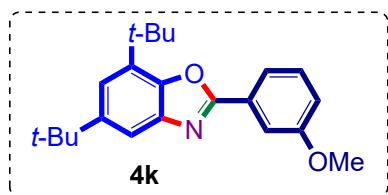

**Yield:** 89% (300 mg); Colorless liquid; Purified by column chromatography (petroleum ether/ethyl acetate 100/1).

**<sup>1</sup>H NMR (400 MHz, CDCl<sub>3</sub>):**  $\delta$  (ppm) 7.89-7.86 (m, 1H), 7.83 (d,  $J$ = 4.0 Hz, 1H), 7.70 (d,  $J$ = 4.0 Hz, 1H), 7.47 (t,  $J$ = 8.0 Hz, 1H), 7.34 (d,  $J$ = 4.0 Hz, 1H), 7.12-7.09 (m, 1H), 3.95 (s, 3H), 1.58 (s, 9H), 1.43 (s, 9H); **<sup>13</sup>C{H} NMR (100 MHz, CDCl<sub>3</sub>):**  $\delta$  (ppm) 162.4, 159.9, 147.7, 146.9, 142.2, 133.7, 130.0, 128.7, 119.8, 119.6, 117.6, 114.2, 112.0, 55.5, 35.1, 34.5, 31.8, 30.0; **Anal. Calcd for C<sub>22</sub>H<sub>27</sub>NO<sub>2</sub>:** C, 78.30; H, 8.06; N, 4.15; Found: C, 78.20; H, 8.02; N, 4.07.

**5,7-Di-tert-butyl-2-(2-chlorophenyl)benzo[d]oxazole (4l).**<sup>4</sup>

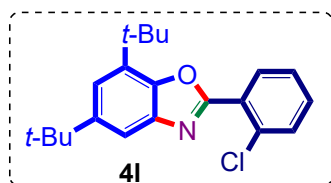

**Yield:** 84% (287 mg); Colorless liquid; Purified by column chromatography (petroleum ether/ethyl acetate 100/1).

**<sup>1</sup>H NMR (400 MHz, CDCl<sub>3</sub>):**  $\delta$  (ppm) 8.14-8.10 (m, 1H), 7.65 (d,  $J$ = 4.0 Hz, 1H), 7.51-7.48 (m, 1H), 7.39-7.33 (m, 2H), 7.28 (d,  $J$ = 4.0 Hz, 1H), 1.47 (s, 9H), 1.33 (s, 9H); **<sup>13</sup>C{H} NMR (100 MHz, CDCl<sub>3</sub>):**  $\delta$  (ppm) 160.6, 148.0, 146.9, 141.4, 134.1, 133.3, 131.9, 131.8, 131.4, 127.0, 126.4, 120.0, 114.4, 35.1, 34.4, 31.8, 29.9; **Anal. Calcd for C<sub>21</sub>H<sub>24</sub>ClNO:** C, 73.78; H, 7.08; N, 4.10; Found: C, 73.69; H, 7.03; N, 4.05.

**5,7-Di-tert-butyl-2-(pyridin-2-yl)benzo[d]oxazole (4m).**<sup>1</sup>

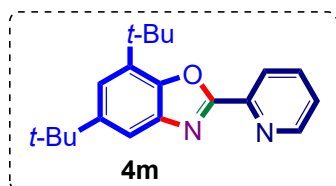

**Yield:** 91% (280 mg); Colorless liquid; Purified by column chromatography (petroleum ether/ethyl acetate 100/1).

**<sup>1</sup>H NMR (300 MHz, CDCl<sub>3</sub>):**  $\delta$  (ppm) 8.84 (d,  $J$ = 6.0 Hz, 1H), 8.30 (d,  $J$ = 6.0 Hz, 1H), 7.91-7.85 (m, 1H), 7.70 (d,  $J$ = 3.0 Hz, 1H), 7.45-7.40 (m, 1H), 7.37 (d,  $J$ = 3.0 Hz, 1H), 1.58 (s, 9H), 1.41 (s, 9H); **<sup>13</sup>C{H} NMR (75 MHz, CDCl<sub>3</sub>):**  $\delta$  (ppm) 161.1, 150.4, 148.0, 147.3, 146.4, 142.1, 136.9, 134.1, 125.2, 123.1, 120.4, 114.8, 35.1, 34.5, 31.8, 30.1; **Anal. Calcd for C<sub>20</sub>H<sub>24</sub>N<sub>2</sub>O:** C, 77.89; H, 7.84; N, 9.08; Found: C, 77.80; H, 7.77; N, 9.02.

**5,7-Di-*tert*-butyl-2-(pyridin-3-yl)benzo[d]oxazole (4n).<sup>3</sup>**

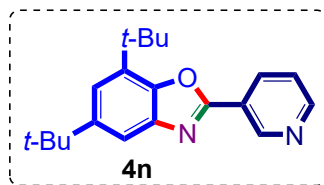

**Yield:** 96% (296 mg); White solid; Purified by column chromatography (petroleum ether/ethyl acetate 100/1).

**<sup>1</sup>H NMR (400 MHz, CDCl<sub>3</sub>):**  $\delta$  (ppm) 9.48 (s, 1H), 8.76 (s, 1H), 8.50 (d,  $J$  = 8.0 Hz, 1H), 7.67 (d,  $J$  = 4.0 Hz, 1H), 7.49-7.46 (m, 1H), 7.35 (d,  $J$  = 4.0 Hz, 1H), 1.55 (s, 9H), 1.40 (s, 9H); **<sup>13</sup>C{H} NMR (100 MHz, CDCl<sub>3</sub>):**  $\delta$  (ppm) 160.0, 151.7, 148.5, 148.2, 147.0, 142.0, 134.4, 133.9, 123.8, 123.7, 120.2, 114.4, 35.1, 34.5, 31.8, 30.0; **Anal. Calcd for C<sub>20</sub>H<sub>24</sub>N<sub>2</sub>O:** C, 77.89; H, 7.84; N, 9.08; Found: C, 77.80; H, 7.71; N, 9.15.

**5,7-Di-*tert*-butyl-2-(thiophen-2-yl)benzo[d]oxazole (4o).<sup>3</sup>**

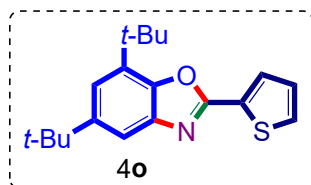

**Yield:** 92% (288 mg); Colorless liquid; Purified by column chromatography (petroleum ether/ethyl acetate 100/1).

**<sup>1</sup>H NMR (300 MHz, CDCl<sub>3</sub>):**  $\delta$  (ppm) 7.79 (d,  $J$  = 6.0 Hz, 1H), 7.52 (d,  $J$  = 3.0 Hz, 1H), 7.42-7.39 (m, 1H), 7.19 (d,  $J$  = 3.0 Hz, 1H), 7.08-7.04 (m, 1H), 1.43 (s, 9H), 1.29 (s, 9H); **<sup>13</sup>C{H} NMR (75 MHz, CDCl<sub>3</sub>):**  $\delta$  (ppm) 158.5, 147.9, 146.6, 142.2, 133.6, 130.1, 129.7, 129.3, 128.1, 119.5, 114.1, 35.1, 34.4, 31.8, 30.0; **Anal. Calcd for C<sub>19</sub>H<sub>23</sub>NOS:** C, 72.80; H, 7.40; N, 4.47; Found: C, 72.71; H, 7.30; N, 4.43.

**5,7-Di-*tert*-butyl-2-(naphthalen-1-yl)benzo[d]oxazole (4p).<sup>3</sup>**

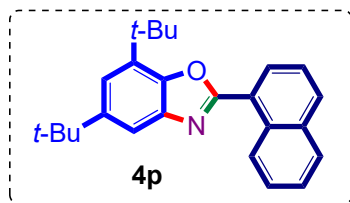

**Yield:** 82% (293 mg); Colorless liquid; Purified by column chromatography (petroleum ether/ethyl acetate 100/1).

**<sup>1</sup>H NMR (400 MHz, CDCl<sub>3</sub>):**  $\delta$  (ppm) 9.38 (d,  $J$  = 12.0 Hz, 1H), 8.32 (d,  $J$  = 8.0 Hz, 1H), 7.95 (d,  $J$  = 8.0 Hz, 1H), 7.86 (d,  $J$  = 8.0 Hz, 1H), 7.69 (d,  $J$  = 4.0 Hz, 1H), 7.62 (t,  $J$  = 8.0 Hz, 1H), 7.56-7.49 (m, 2H), 7.28 (d,  $J$  = 4.0 Hz, 1H), 1.51 (s, 9H), 1.35 (s, 9H); **<sup>13</sup>C{H} NMR (100 MHz, CDCl<sub>3</sub>):**  $\delta$  (ppm) 162.3, 147.7, 146.4, 142.5, 133.9, 133.7, 131.9, 130.7, 129.0, 128.6, 127.8, 126.4, 126.3, 125.0, 124.1, 119.7, 114.4, 35.1, 34.5, 31.9, 30.1; **Anal. Calcd for C<sub>25</sub>H<sub>27</sub>NO:** C, 83.99; H, 7.61; N, 3.92; Found: C, 83.83; H, 7.52; N, 4.01.

**5,7-Di-*tert*-butyl-2-(naphthalen-2-yl)benzo[d]oxazole (4q).**<sup>6</sup>

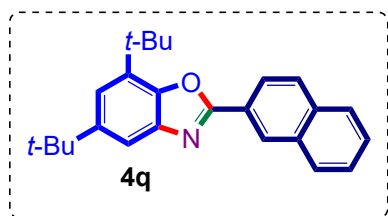

**Yield:** 88% (314 mg); Colorless liquid; Purified by column chromatography (petroleum ether/ethyl acetate 100/1).

**<sup>1</sup>H NMR (400 MHz, CDCl<sub>3</sub>):**  $\delta$  (ppm) 8.78 (s, 1H), 8.36-8.33 (m, 1H), 8.05-8.00 (m, 2H), 7.94-7.91 (m, 1H), 7.72 (d,  $J$ = 4.0 Hz, 1H), 7.62-7.59 (m, 2H), 7.36 (d,  $J$ = 4.0 Hz, 1H), 1.63 (s, 9H), 1.44 (s, 9H); **<sup>13</sup>C{H} NMR (100 MHz, CDCl<sub>3</sub>):**  $\delta$  (ppm) 162.6, 147.8, 147.0, 142.3, 134.6, 133.7, 133.0, 128.9, 128.7, 127.9, 127.7, 127.6, 126.8, 124.7, 123.9, 119.7, 114.2, 35.1, 34.5, 31.8, 30.1; **Anal. Calcd for C<sub>25</sub>H<sub>27</sub>NO:** C, 83.99; H, 7.61; N, 3.92; Found: C, 83.88; H, 7.55; N, 3.98.

**2-(Anthracen-9-yl)-5,7-di-*tert*-butylbenzo[d]oxazole (4r).**

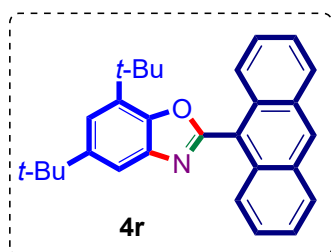

**Yield:** 72% (293 mg); Pale brown liquid; Purified by column chromatography (petroleum ether/ethyl acetate 100/1).

**<sup>1</sup>H NMR (400 MHz, CDCl<sub>3</sub>):**  $\delta$  (ppm) 8.56 (s, 1H), 8.08-8.04 (m, 2H), 8.00-7.96 (m, 2H), 7.77 (d,  $J$ = 4.0 Hz, 1H), 7.43-7.39 (m, 4H), 7.36 (d,  $J$ = 4.0 Hz, 1H), 1.44 (s, 9H), 1.39 (s, 9H); **<sup>13</sup>C{H} NMR (100 MHz, CDCl<sub>3</sub>):**  $\delta$  (ppm) 161.4, 147.8, 147.4, 142.2, 134.2, 131.3, 131.1, 130.6, 128.6, 127.2, 125.7, 125.5, 121.8, 119.8, 114.6, 35.2, 34.6, 31.9, 30.0; **Anal. Calcd for C<sub>29</sub>H<sub>29</sub>NO:** C, 85.47; H, 7.17; N, 3.44; Found: C, 85.10; H, 6.92; N, 3.25.

**5,7-Di-*tert*-butyl-2-(phenanthren-9-yl)benzo[d]oxazole (4s).**

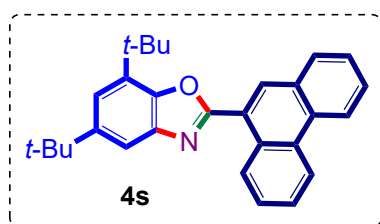

**Yield:** 80% (326 mg); Colorless liquid; Purified by column chromatography (petroleum ether/ethyl acetate 100/1).

**<sup>1</sup>H NMR (400 MHz, CDCl<sub>3</sub>):**  $\delta$  (ppm) 9.53-9.50 (m, 1H), 8.83 (d,  $J$ = 8.0 Hz, 1H), 8.77 (d,  $J$ = 8.0 Hz, 1H), 8.69 (s, 1H), 8.09 (d,  $J$ = 8.0 Hz, 1H), 7.83 (d,  $J$ = 4.0 Hz, 1H), 7.82-7.77 (m, 3H), 7.70 (d,  $J$ = 8.0 Hz, 1H), 7.42 (d,  $J$ = 4.0 Hz, 1H), 1.56 (s, 9H), 1.48 (s, 9H); **<sup>13</sup>C{H} NMR (100 MHz, CDCl<sub>3</sub>):**  $\delta$  (ppm) 162.3, 147.7, 146.4, 142.5, 133.7, 131.6, 131.1, 130.8, 130.6, 129.8, 128.8, 128.5, 127.5, 127.1 (2C), 123.1, 122.9, 122.7, 119.8, 114.5, 35.1, 34.5, 31.9, 30.1; **Anal. Calcd for C<sub>29</sub>H<sub>29</sub>NO:** C, 85.47; H, 7.17; N, 3.44; Found: C, 85.20; H, 6.97; N, 3.32.

**5-(*Tert*-butyl)-2-(*p*-tolyl)benzo[*d*]oxazole (4t).**<sup>4</sup>

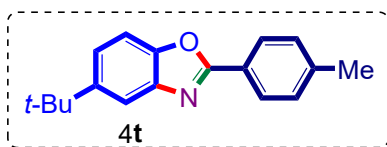

**Yield:** 85% (225 mg); Colorless liquid; Purified by column chromatography (petroleum ether/ethyl acetate 100/1).

**<sup>1</sup>H NMR (400 MHz, CDCl<sub>3</sub>):**  $\delta$  (ppm) 8.06 (d,  $J$  = 12.0 Hz, 2H), 7.60 (d,  $J$  = 12.0 Hz, 1H), 7.53 (d,  $J$  = 4.0 Hz, 1H), 7.36-7.31 (m, 1H), 7.25 (d,  $J$  = 12.0 Hz, 2H), 2.37 (s, 3H), 1.33 (s, 9H); **<sup>13</sup>C{H} NMR (75 MHz, CDCl<sub>3</sub>):**  $\delta$  (ppm) 163.1, 150.9, 149.0, 141.8, 139.6, 129.6, 127.4, 124.5, 122.2, 118.8, 107.2, 35.2, 31.7, 21.6; **Anal. Calcd for C<sub>18</sub>H<sub>19</sub>NO:** C, 81.47; H, 7.22; N, 5.28; Found: C, 81.07; H, 6.95; N, 5.10.

**4-methoxy-2-phenylbenzo[*d*]oxazole (4w).**<sup>7</sup>

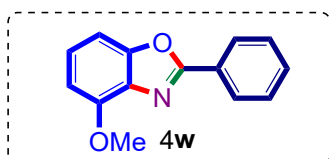

**Yield:** 50% (112 mg); Yellow liquid; Purified by column chromatography (petroleum ether/ethyl acetate 100/1).

**<sup>1</sup>H NMR (400 MHz, CDCl<sub>3</sub>):**  $\delta$  (ppm) 8.25-8.22 (m, 2H), 7.46-7.42 (m, 3H), 7.22 (t,  $J$  = 8.0 Hz, 1H), 7.14 (d,  $J$  = 8.0 Hz, 1H), 6.75 (d,  $J$  = 8.0 Hz, 1H), 4.00 (s, 3H); **<sup>13</sup>C{H} NMR (75 MHz, CDCl<sub>3</sub>):**  $\delta$  (ppm) 162.8, 152.2, 151.8, 131.7, 131.3, 128.8, 127.6, 127.1, 125.7, 105.8, 103.4, 56.1; **Anal. Calcd for C<sub>14</sub>H<sub>11</sub>NO<sub>2</sub>:** C, 74.65; H, 4.92; N, 6.22; Found: C, 74.48; H, 4.76; N, 6.12.

**5,7-Di-*tert*-butyl-2-(4-chlorophenyl)-4-methylbenzo[*d*]oxazole (4x).**

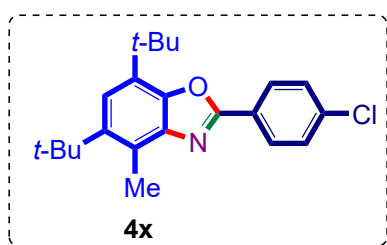

**Yield:** 80% (284 mg); Colorless liquid; Purified by column chromatography (petroleum ether/ethyl acetate 100/1).

**<sup>1</sup>H NMR (400 MHz, CDCl<sub>3</sub>):**  $\delta$  (ppm) 8.22 (d,  $J$  = 8.0 Hz, 1H), 7.51 (d,  $J$  = 12.0 Hz, 2H), 7.35 (s, 1H), 2.87 (s, 3H), 1.55 (s, 9H), 1.52 (s, 9H); **<sup>13</sup>C{H} NMR (100 MHz, CDCl<sub>3</sub>):**  $\delta$  (ppm) 160.5, 146.4, 143.7, 143.5, 137.1, 130.3, 129.1, 128.7, 126.3, 126.1, 120.3, 36.2, 34.3, 31.3, 30.0, 16.3; **Anal. Calcd for C<sub>22</sub>H<sub>26</sub>ClNO:** C, 74.24; H, 7.36; N, 3.94; Found: C, 74.09; H, 7.22; N, 4.04.

**2-(4-chlorophenyl)-4,5,7-triisopropylbenzo[d]oxazole (4z).**

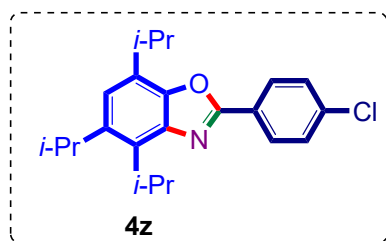

**Yield:** 75% (266 mg); Colorless liquid; Purified by column chromatography (petroleum ether/ethyl acetate 100/1).

**<sup>1</sup>H NMR (400 MHz, CDCl<sub>3</sub>):** δ (ppm) 8.10 (d, *J* = 8.0 Hz, 1H), 7.39 (d, *J* = 8.0 Hz, 2H), 7.02 (s, 1H), 3.38-3.53 (m, 2H), 3.23-3.33 (m, 1H), 1.42 (d, *J* = 8.0 Hz, 6H), 1.34 (d, *J* = 8.0 Hz, 6H), 1.22 (d, *J* = 8.0 Hz, 6H); **<sup>13</sup>C{<sup>1</sup>H} NMR (100 MHz, CDCl<sub>3</sub>):** δ (ppm) 160.2, 149.5, 142.5, 138.6, 138.1, 136.9, 129.1, 128.6, 126.5, 126.2, 118.2, 29.8, 29.3, 27.1, 24.4, 23.2, 22.1;

**Anal. Calcd for C<sub>22</sub>H<sub>26</sub>ClNO:** C, 74.24; H, 7.36; N, 3.94; Found: C, 73.95; H, 7.13; N, 3.81.

**5,7-Di-*tert*-butyl-2-(pyridin-4-yl)benzo[d]oxazole (4aa).<sup>5</sup>**

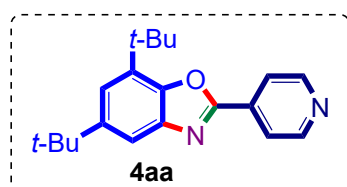

**Yield:** 72% (222 mg); White solid; Purified by column chromatography (petroleum ether/ethyl acetate 100/1).

**<sup>1</sup>H NMR (400 MHz, CDCl<sub>3</sub>):** δ (ppm) 8.82 (d, *J* = 4.0 Hz, 2H), 8.09 (d, *J* = 8.0 Hz, 2H), 7.69 (d, *J* = 4.0 Hz, 1H), 7.38 (d, *J* = 4.0 Hz, 1H), 1.56 (s, 9H), 1.41 (s, 9H); **<sup>13</sup>C{<sup>1</sup>H} NMR (100 MHz, CDCl<sub>3</sub>):** δ (ppm) 160.0, 150.7, 148.4, 147.1, 142.0, 134.6, 134.1, 120.8, 114.7, 35.1, 34.5, 31.7, 30.0; **Anal. Calcd for C<sub>20</sub>H<sub>24</sub>N<sub>2</sub>O:** C, 77.89; H, 7.84; N, 9.08; Found: C, 77.75; H, 7.78; N, 9.13.

**5,7-Di-*tert*-butyl-2-(3,4-dimethoxyphenyl)benzo[d]oxazole (4ab).<sup>5</sup>**

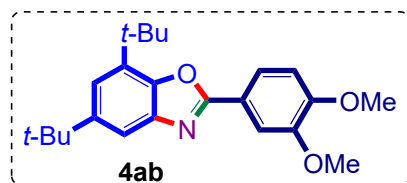

**Yield:** 81% (297 mg); Colorless liquid; Purified by column chromatography (petroleum ether/ethyl acetate 50/1).

**<sup>1</sup>H NMR (400 MHz, CDCl<sub>3</sub>):** δ (ppm) 7.75 (dd, *J* = 4.0, 8.0 Hz, 1H), 7.68 (d, *J* = 4.0 Hz, 1H), 7.56 (d, *J* = 4.0 Hz, 1H), 7.19 (d, *J* = 4.0 Hz, 1H), 6.89 (d, *J* = 8.0 Hz, 1H), 3.93 (s, 3H), 3.86 (s, 3H), 1.46 (s, 9H), 1.30 (s, 9H); **<sup>13</sup>C{<sup>1</sup>H} NMR (100 MHz, CDCl<sub>3</sub>):** δ (ppm) 162.6, 151.7, 149.2, 147.6, 146.8, 142.32, 133.5, 120.8, 120.2, 119.1, 113.9, 110.9, 109.8, 56.1, 56.0, 35.0, 34.4, 31.8, 30.0. **Anal. Calcd for C<sub>23</sub>H<sub>29</sub>NO<sub>3</sub>:** C, 75.17; H, 7.95; N, 3.81. Found: C, 75.08; H, 7.88; N, 3.70.

**4,6-Di-*tert*-butyl-3-morpholinobenzene-1,2-diol (1g).**<sup>8</sup>

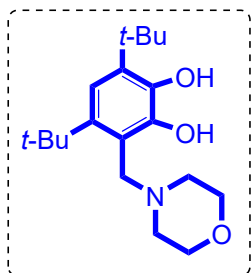

**Yield:** 94% (302 mg); Colorless crystal; Purified by wash with glacial acetic acid and water.

**<sup>1</sup>H NMR (400 MHz, CDCl<sub>3</sub>):** δ (ppm) 12.36 (s, 1H), 6.81 (s, 1H), 6.06 (s, 1H), 4.05 (s, 2H), 3.87-3.59 (m, 4H), 2.86-2.39 (m, 4H), 1.43 (s, 9H), 1.39 (s, 9H); **<sup>13</sup>C{<sup>1</sup>H} NMR (100 MHz, CDCl<sub>3</sub>):** δ (ppm) 146.0, 141.6, 138.0, 132.8, 115.8, 114.5, 66.8, 58.8, 52.4, 35.4, 34.7, 32.0, 29.4; **Anal. Calcd for C<sub>19</sub>H<sub>31</sub>NO<sub>3</sub>:** C, 70.99; H, 9.72; N, 4.36; Found: C, 70.72; H, 9.56; N, 4.24.

## References

- (1) Meng, X.; Wang, Y.; Wang, Y.; Chen, B.; Jing, Z.; Chen, G.; Zhao, P. OMS-2-Supported Cu Hydroxide-Catalyzed Benzoxazoles Synthesis from Catechols and Amines via Domino Oxidation Process at Room Temperature. *J. Org. Chem.* **2017**, *82* (13), 6922–6931. <https://doi.org/10.1021/acs.joc.7b01119>.
- (2) Aboonajmi, J.; Panahi, F.; Sharghi, H. One-Pot Multicomponent Coupling Reaction of Catechols, Benzyl Alcohols/Benzyl Methyl Ethers, and Ammonium Acetate toward Synthesis of Benzoxazoles. *ACS Omega* **2021**, *6* (34), 22395–22399. <https://doi.org/10.1021/acsomega.1c03207>.
- (3) Chen, X.; Ji, F.; Zhao, Y.; Liu, Y.; Zhou, Y.; Chen, T.; Yin, S. F. Copper-Catalyzed Aerobic Oxidative C(Aryl)-OH Bond Functionalization of Catechols with Amines Affording Benzoxazoles. *Adv. Synth. Catal.* **2015**, *357* (13), 2924–2930. <https://doi.org/10.1002/adsc.201500515>.
- (4) Sharghi, H.; Aboonajmi, J.; Aberi, M.; Shekouhy, M. Amino Acids: Nontoxic and Cheap Alternatives for Amines for the Synthesis of Benzoxazoles through the Oxidative Functionalization of Catechols. *Adv. Synth. Catal.* **2020**, *362* (5), 1064–1083. <https://doi.org/10.1002/adsc.201901096>.
- (5) Sharghi, H.; Aboonajmi, J.; Aberi, M. One-Pot Multicomponent Reaction of Catechols, Ammonium Acetate, and Aldehydes for the Synthesis of Benzoxazole Derivatives Using the Fe(III)-Salen Complex. *J. Org. Chem.* **2020**, *85* (10), 6567–6577. <https://doi.org/10.1021/acs.joc.0c00560>.
- (6) Chen, F.; Zhu, C.; Jiang, H. [3+1+1] Annulation Reaction of Benzo-1,2-Quinones, Aldehydes and Hydroxylamine Hydrochloride: Access to Benzoxazoles with Inorganic Nitrogen Source. *Adv. Synth. Catal.* **2021**, *363* (8), 2124–2132. <https://doi.org/10.1002/adsc.202001521>.
- (7) Wu, S.; Zhou, D.; Geng, F.; Dong, J.; Su, L.; Zhou, Y.; Yin, S. F. Metal-Free Oxidative Condensation of Catechols, Aldehydes and NH<sub>4</sub>OAc towards Benzoxazoles. *Adv. Synth. Catal.* **2021**, *363* (14), 3607–3614. <https://doi.org/10.1002/adsc.202100249>.
- (8) Sayapin, Y. A.; Tupaeva, I. O.; Tkachev, V. V.; Shilov, G. V. 6,6'-[Piperazine-1,4-Diylbis(Methylene)]Bis[3,5-Di(Tert-Butyl)-1,2-Benzoquinone]: Synthesis and Properties. *Russ. J. Org. Chem.* **2016**, *52* (2), 214–218. <https://doi.org/10.1134/S1070428016020093>.

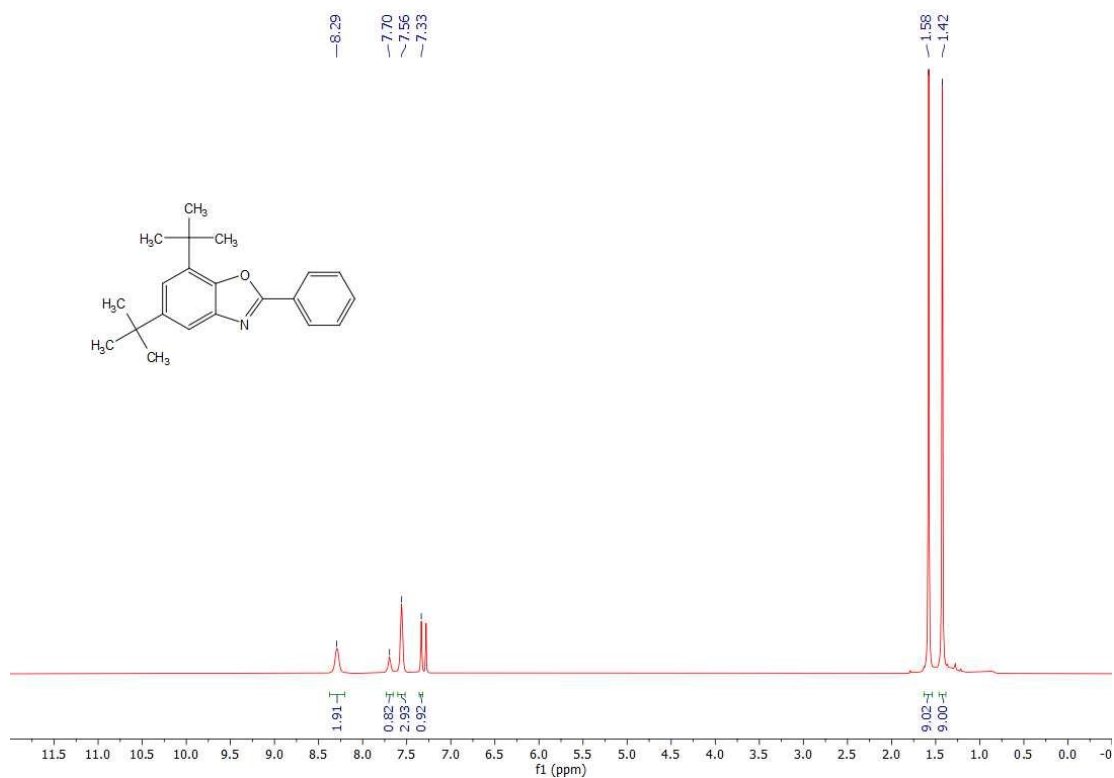

Figure S1. <sup>1</sup>H NMR spectrum of 5,7-di-tert-butyl-2-phenylbenzo[d]oxazole (4a) in CDCl<sub>3</sub> at 300 MHz.

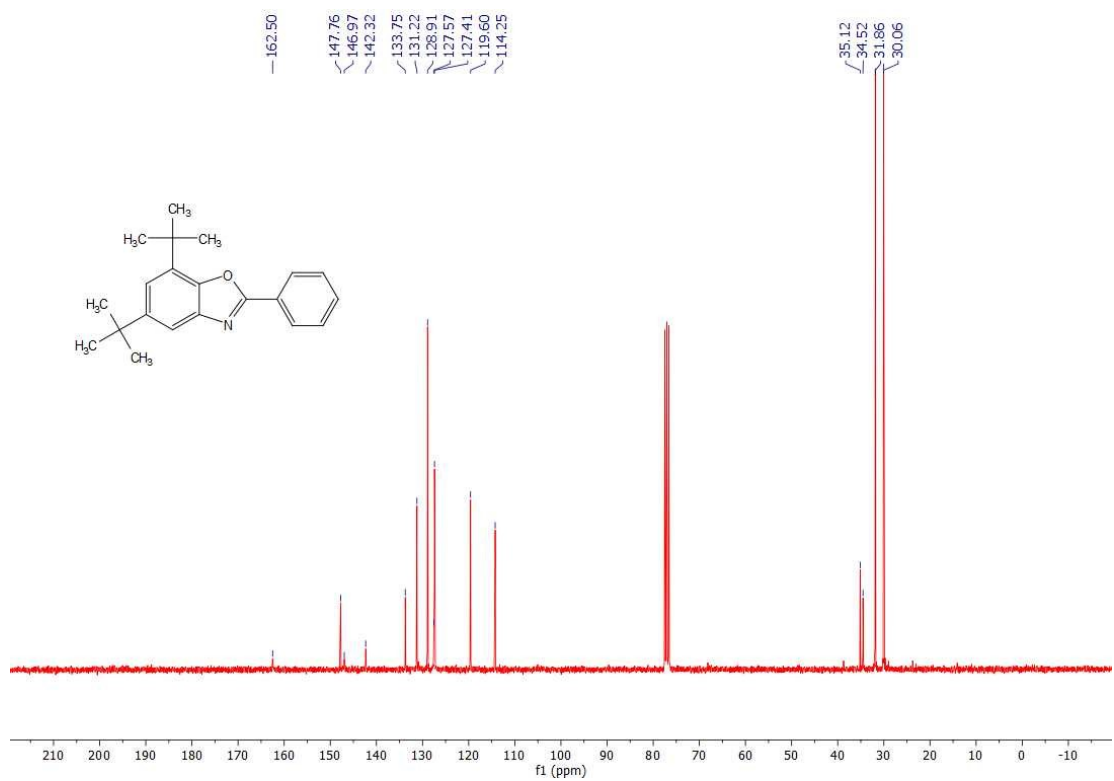

Figure S2. <sup>13</sup>C NMR spectrum of 5,7-di-tert-butyl-2-phenylbenzo[d]oxazole (4a) in CDCl<sub>3</sub> at 75 MHz.



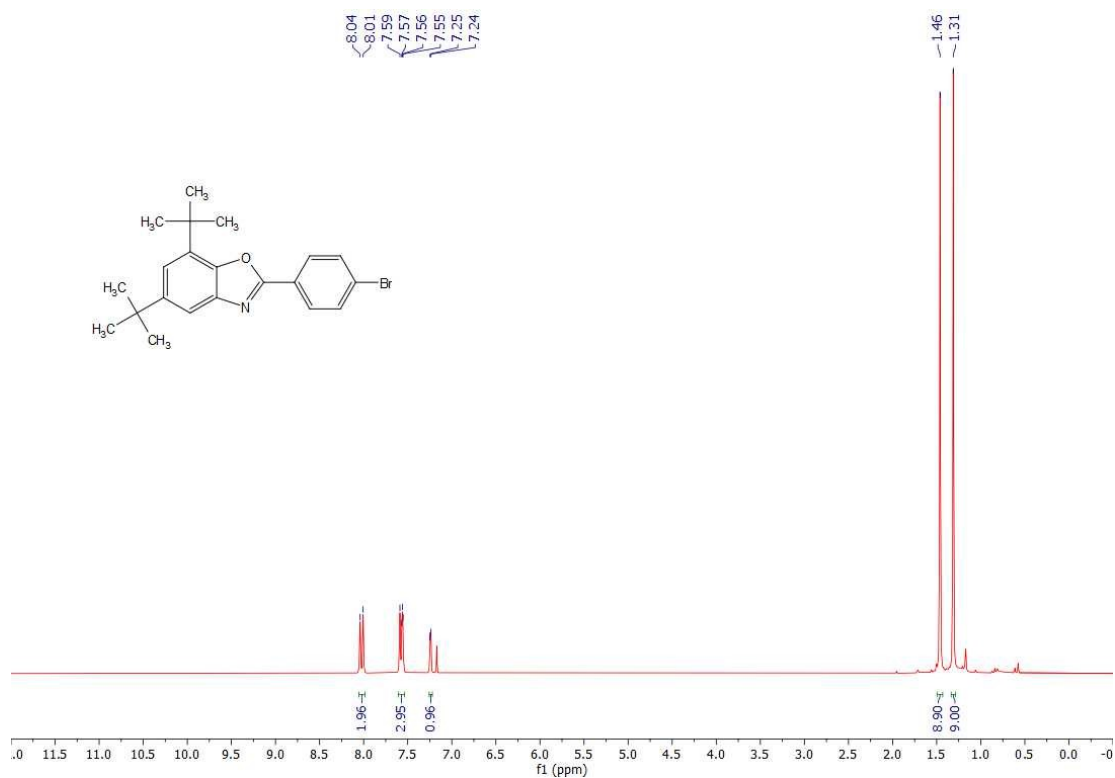

Figure S3. <sup>1</sup>H NMR spectrum of 5,7-di-tert-butyl-2-(4-bromophenyl)benzo[d]oxazole (4b) in CDCl<sub>3</sub> at 250 MHz.

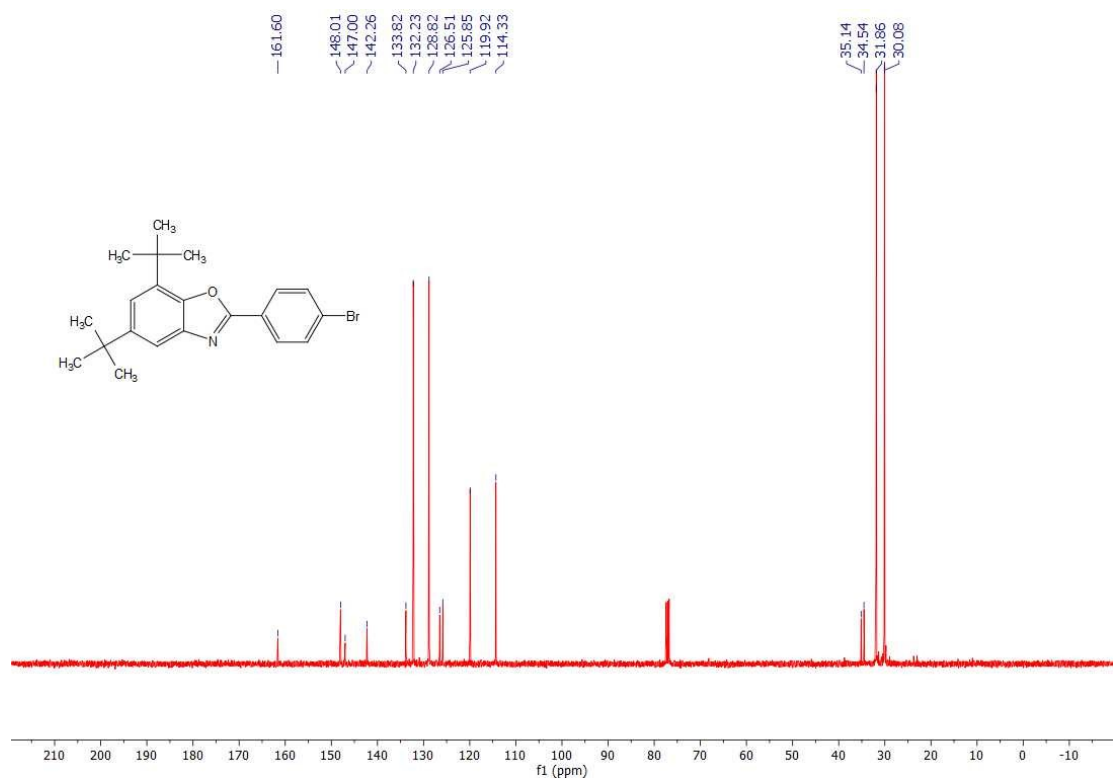

Figure S4. <sup>13</sup>C NMR spectrum of 5,7-di-tert-butyl-2-(4-bromophenyl)benzo[d]oxazole (4b) in CDCl<sub>3</sub> at 100 MHz.

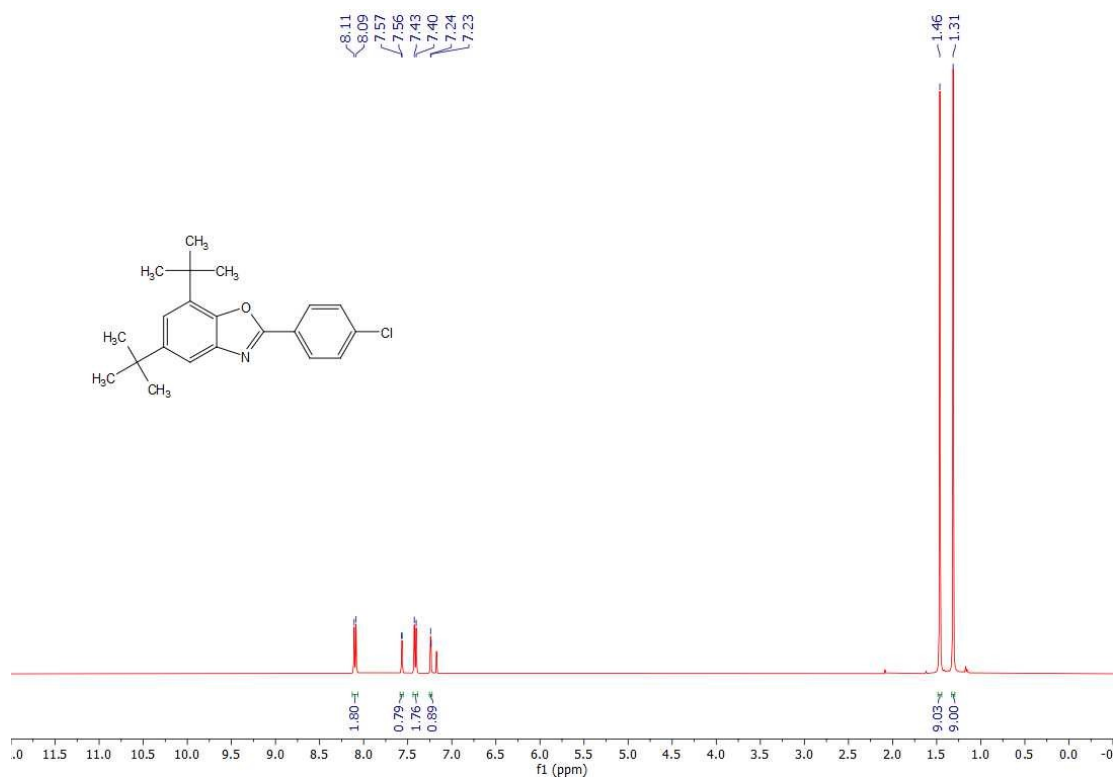

Figure S5.  $^1\text{H}$  NMR spectrum of 5,7-di-*tert*-butyl-2-(4-chlorophenyl)benzo[*d*]oxazole (4c) in  $\text{CDCl}_3$  at 400 MHz.

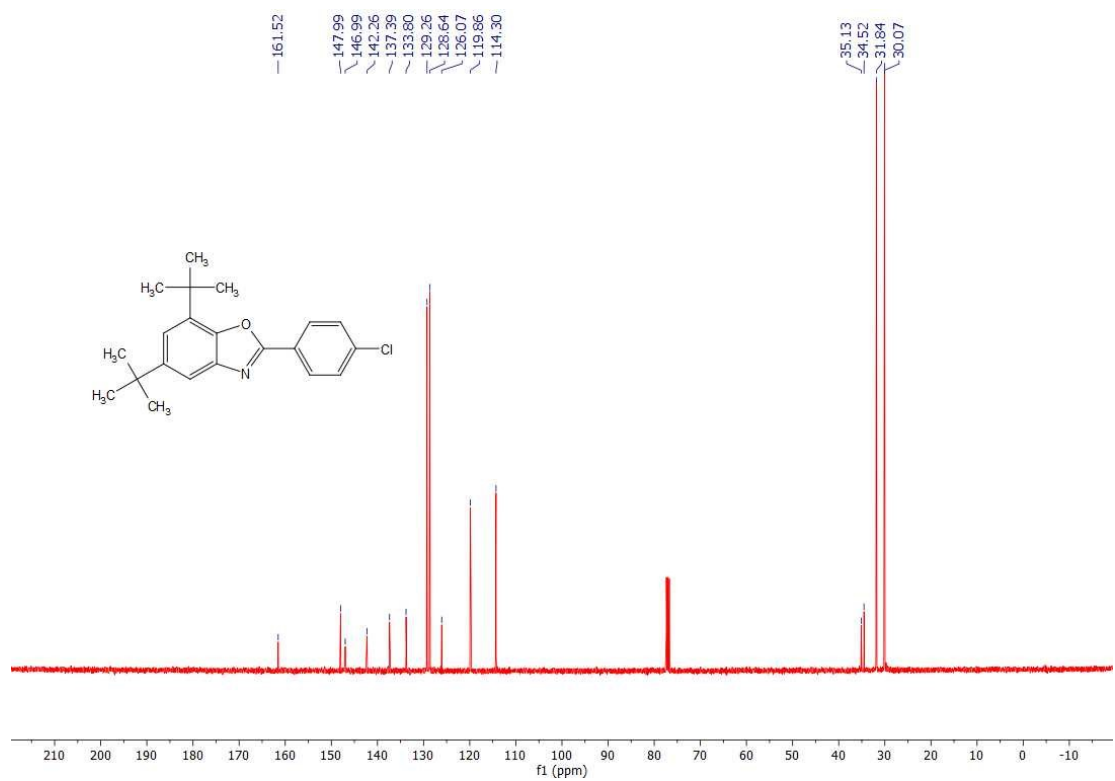

Figure S6.  $^{13}\text{C}$  NMR spectrum of 5,7-di-*tert*-butyl-2-(4-chlorophenyl)benzo[*d*]oxazole (4c) in  $\text{CDCl}_3$  at 100 MHz.

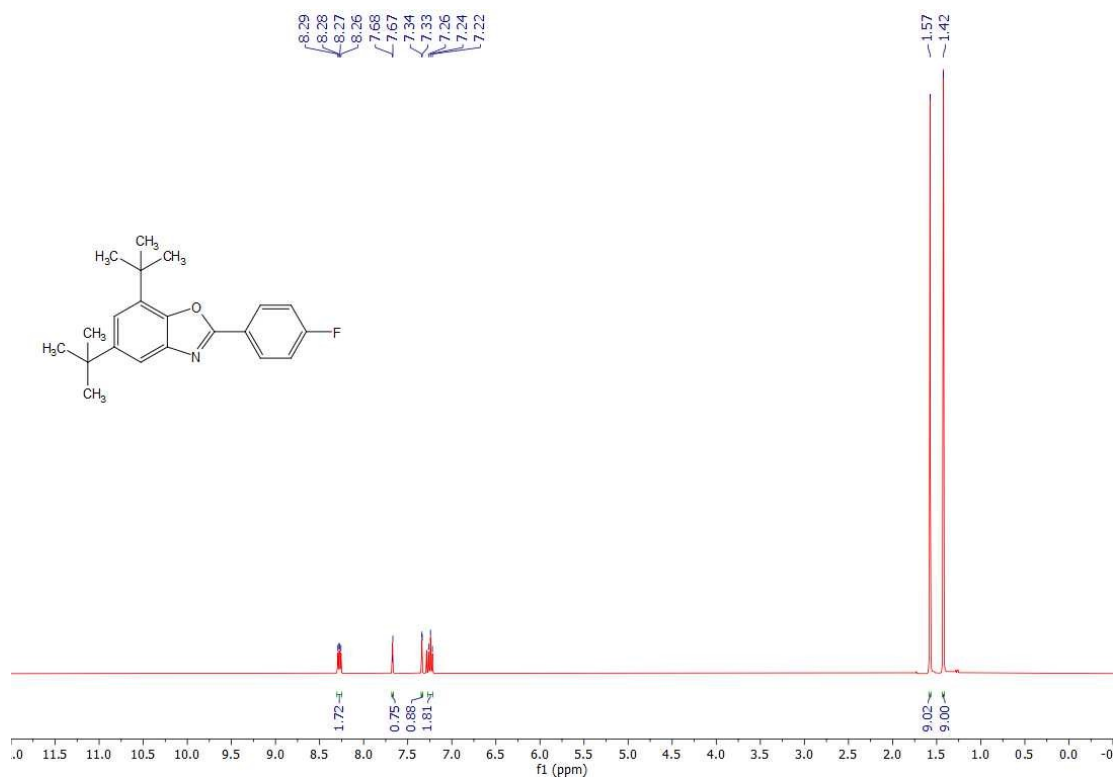

Figure S7. <sup>1</sup>H NMR spectrum of 5,7-di-tert-butyl-2-(4-fluorophenyl)benzo[d]oxazole (4d) in CDCl<sub>3</sub> at 400 MHz.

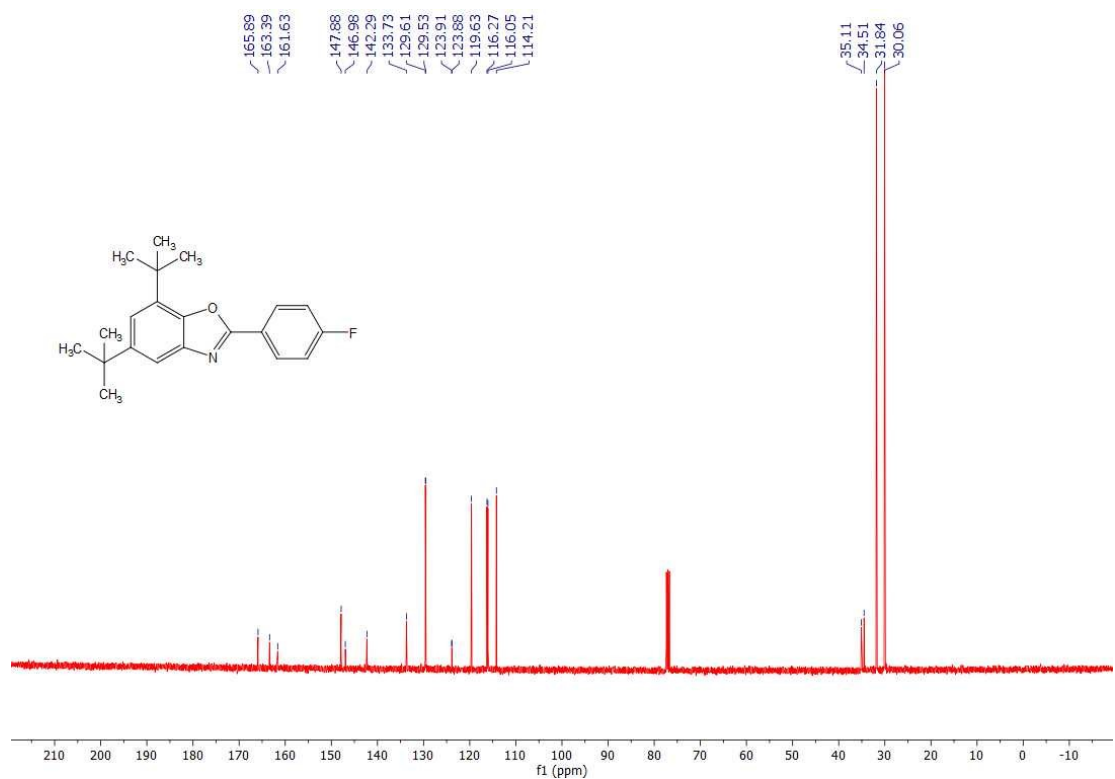

Figure S8. <sup>13</sup>C NMR spectrum of 5,7-di-tert-butyl-2-(4-fluorophenyl)benzo[d]oxazole (4d) in CDCl<sub>3</sub> at 100 MHz.

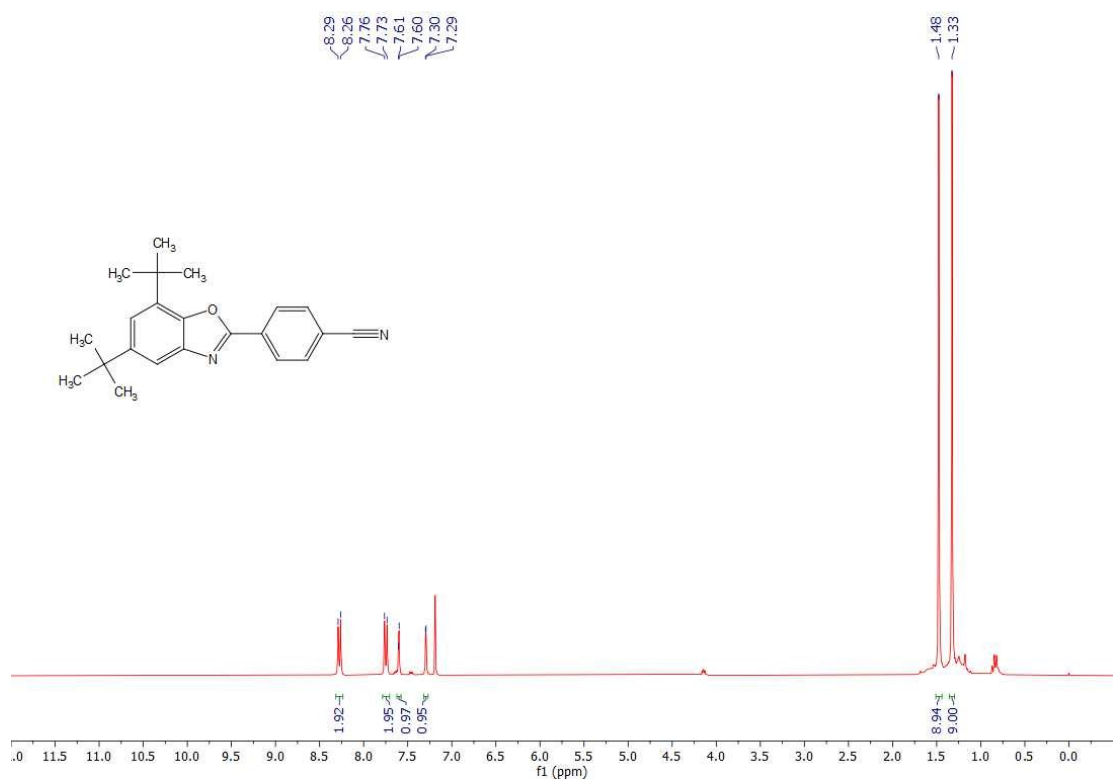

Figure S9. <sup>1</sup>H NMR spectrum of 4-(5,7-di-tert-butylbenzo[d]oxazol-2-yl)benzonitrile (4e) in CDCl<sub>3</sub> at 300 MHz.

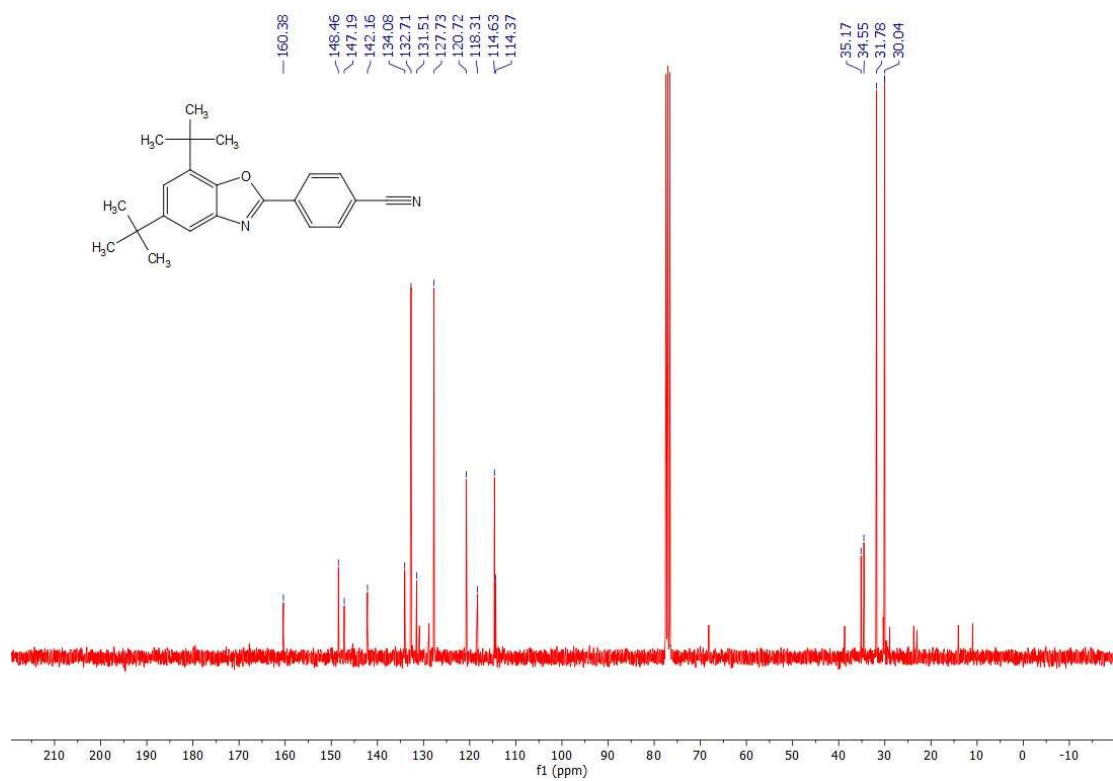

Figure S10. <sup>13</sup>C NMR spectrum of 4-(5,7-di-tert-butylbenzo[d]oxazol-2-yl)benzonitrile (4e) in CDCl<sub>3</sub> at 75 MHz.

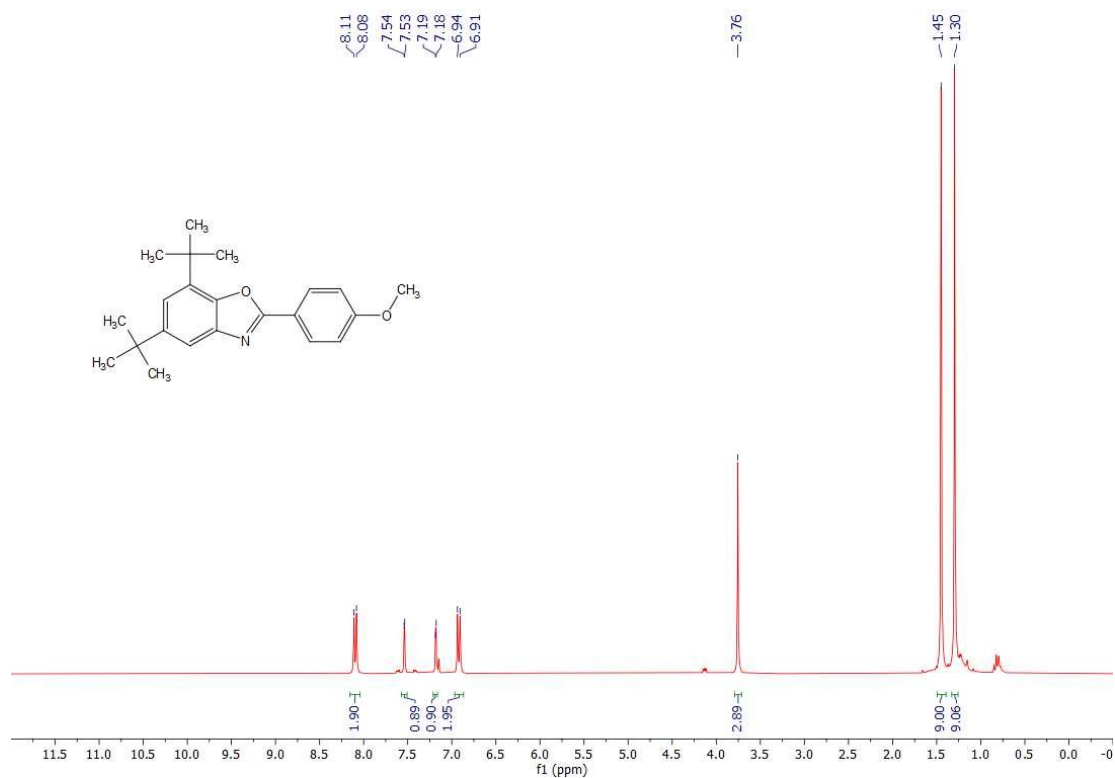

Figure S11. <sup>1</sup>H NMR spectrum of 5,7-di-tert-butyl-2-(4-methoxyphenyl)benzo[d]oxazole (4f) in CDCl<sub>3</sub> at 300 MHz.

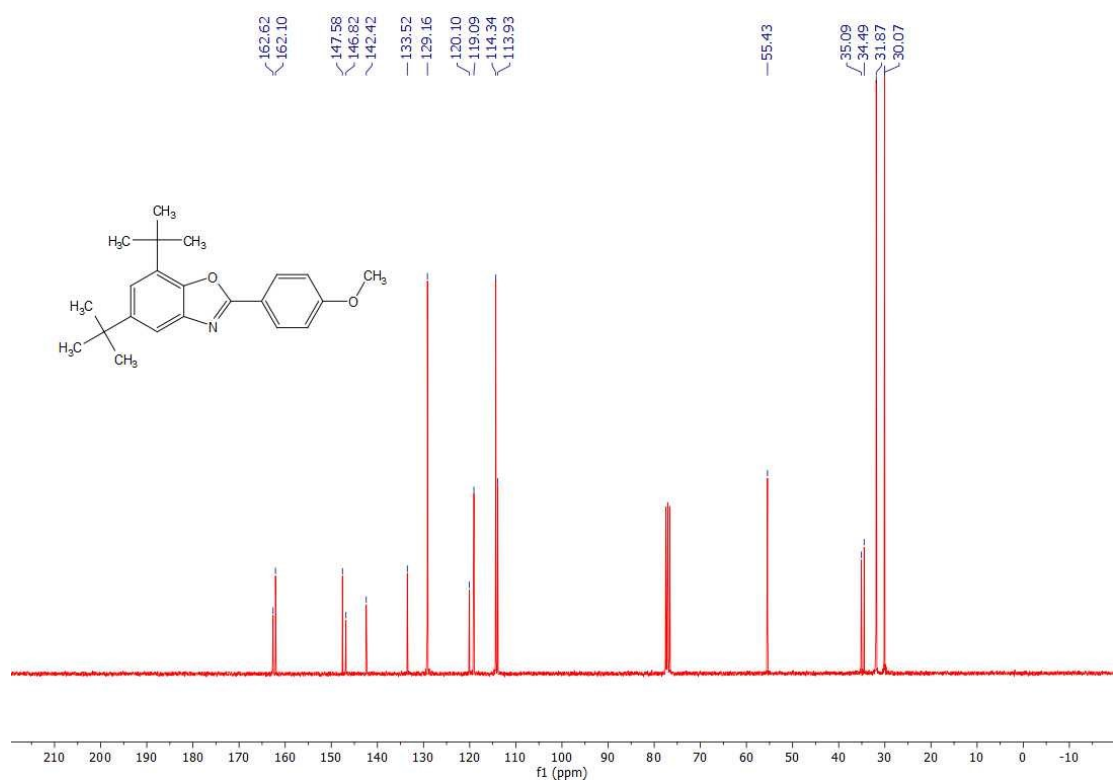

Figure S12. <sup>13</sup>C NMR spectrum of 5,7-di-tert-butyl-2-(4-methoxyphenyl)benzo[d]oxazole (4f) in CDCl<sub>3</sub> at 75 MHz.

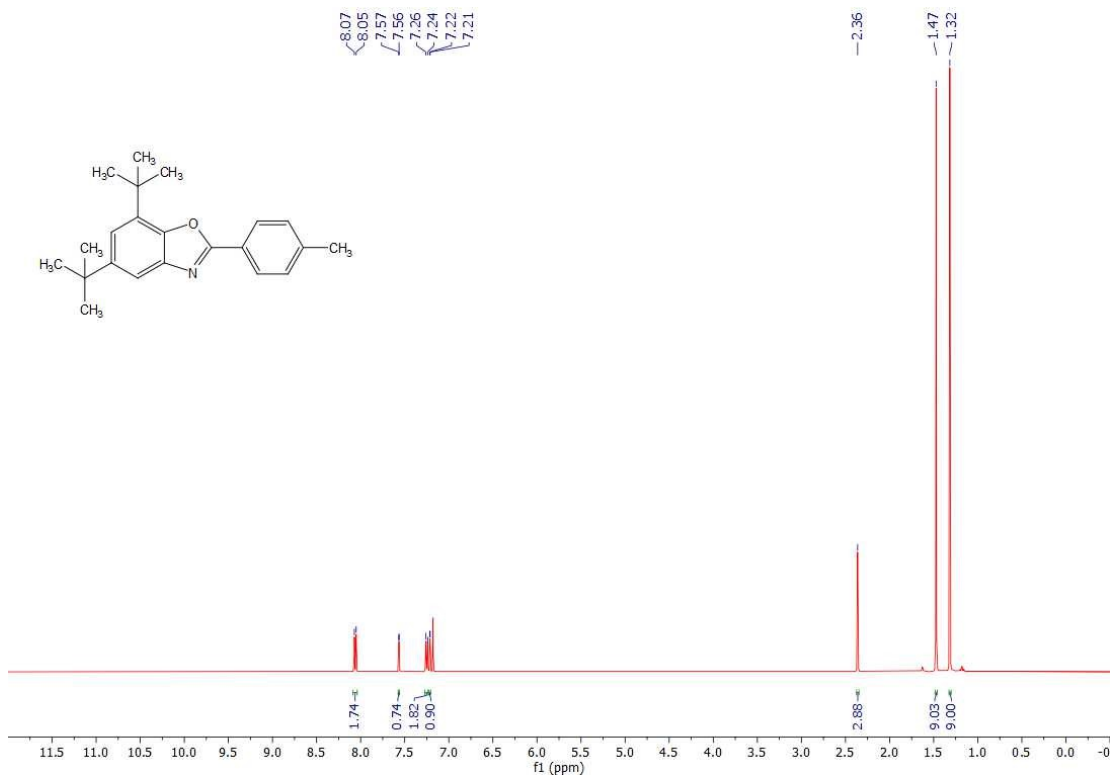

Figure S13. <sup>1</sup>H NMR spectrum of 5,7-di-tert-butyl-2-(p-tolyl)benzo[d]oxazole (4g) in CDCl<sub>3</sub> at 400 MHz.

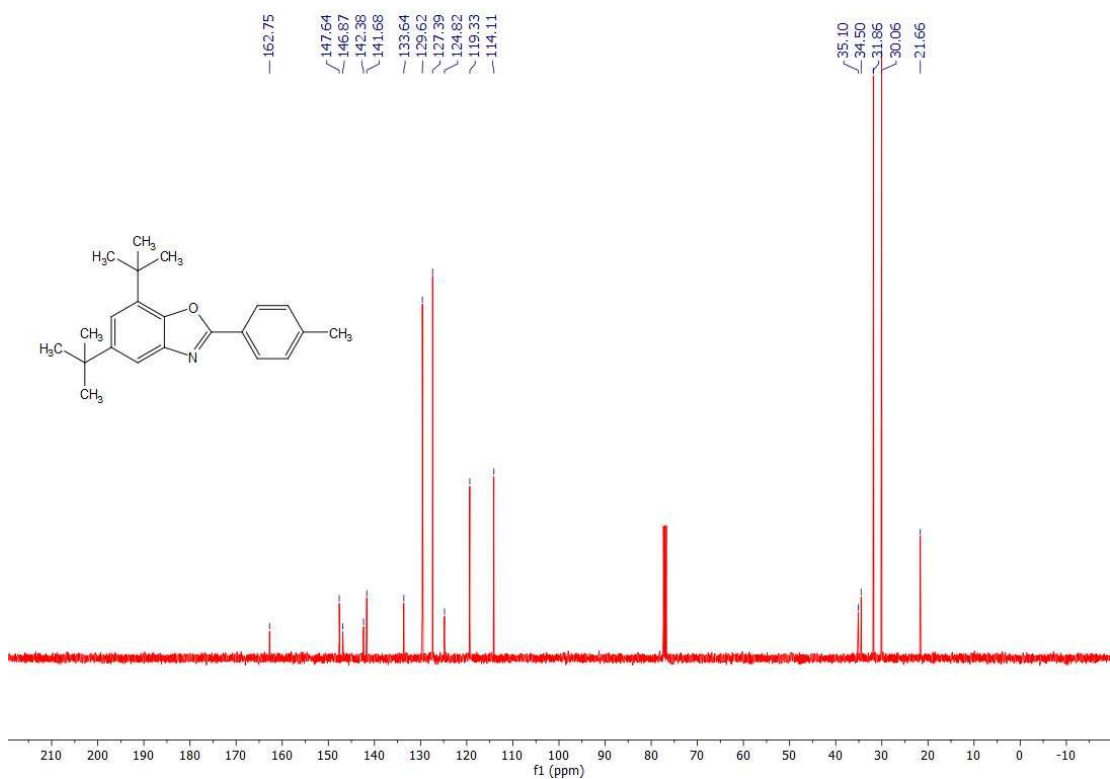

Figure S14. <sup>13</sup>C NMR spectrum of 5,7-di-tert-butyl-2-(p-tolyl)benzo[d]oxazole (4g) in CDCl<sub>3</sub> at 100 MHz.

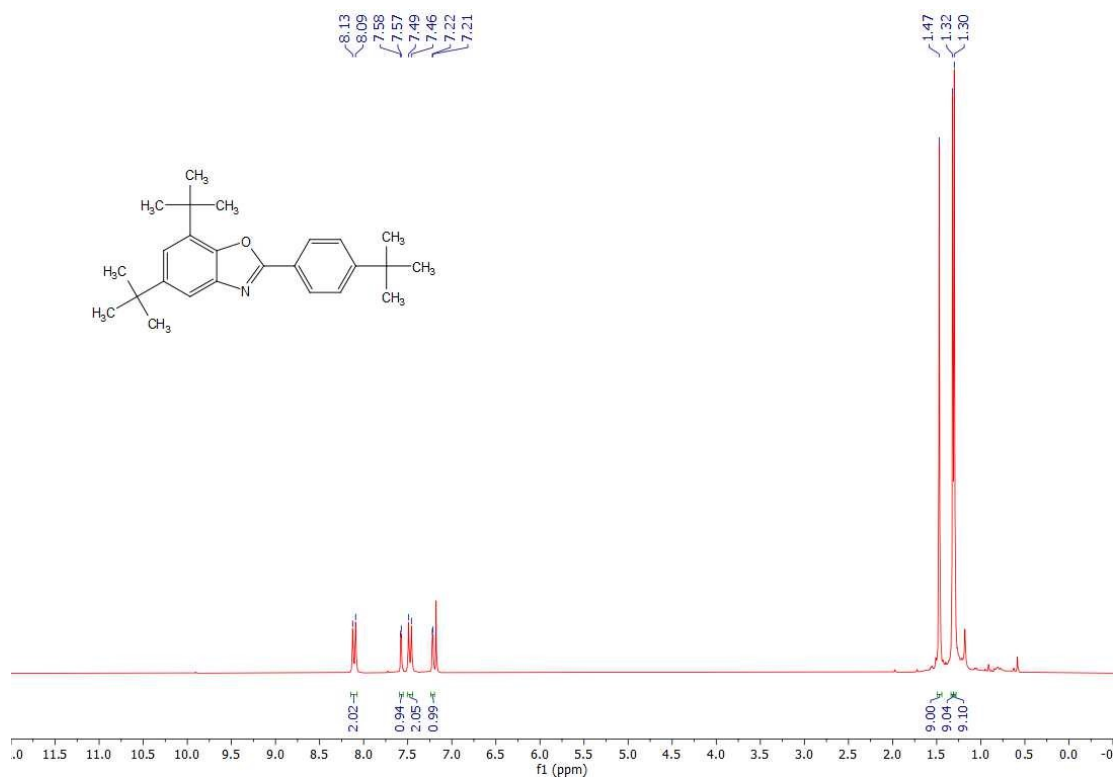

Figure S15. <sup>1</sup>H NMR spectrum of 5,7-di-*tert*-butyl-2-(4-(*tert*-butyl)phenyl)benzo[*d*]oxazole (4h) in CDCl<sub>3</sub> at 250 MHz.

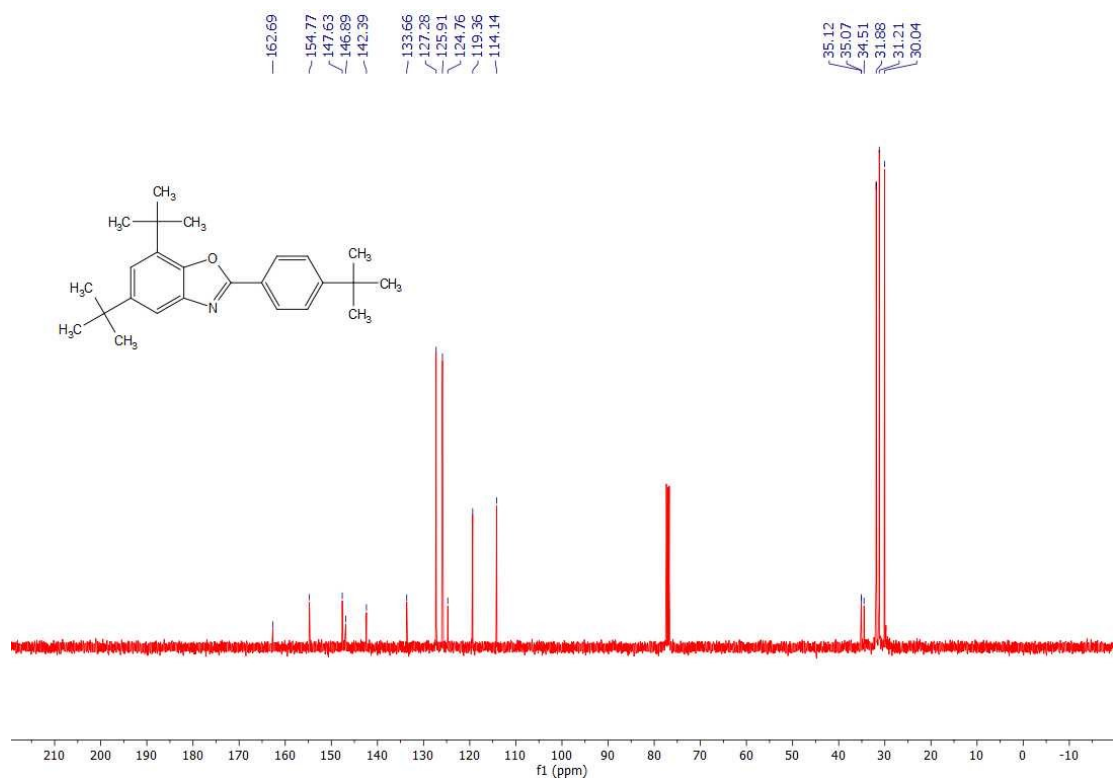

Figure S16. <sup>13</sup>C NMR spectrum of 5,7-di-*tert*-butyl-2-(4-(*tert*-butyl)phenyl)benzo[*d*]oxazole (4h) in CDCl<sub>3</sub> at 100 MHz.

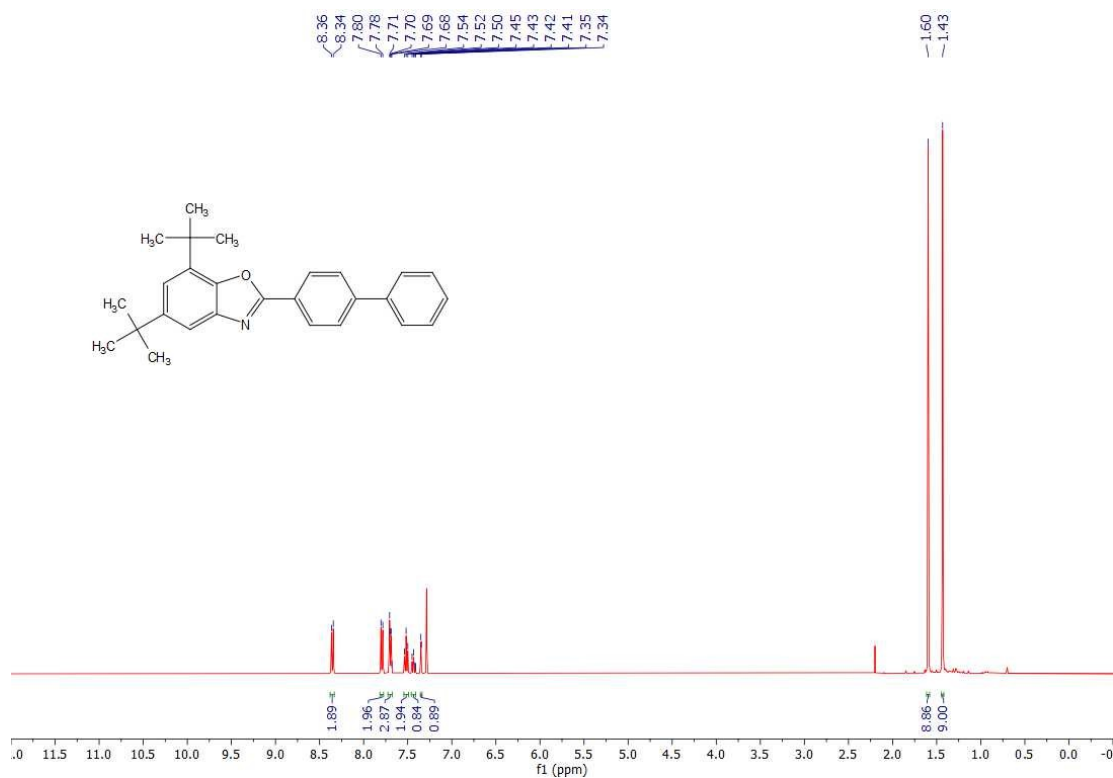

Figure S17. <sup>1</sup>H NMR spectrum of 2-([1,1'-biphenyl]-4-yl)-5,7-di-tert-butylbenzo[d]oxazole (4i) in CDCl<sub>3</sub> at 400 MHz.

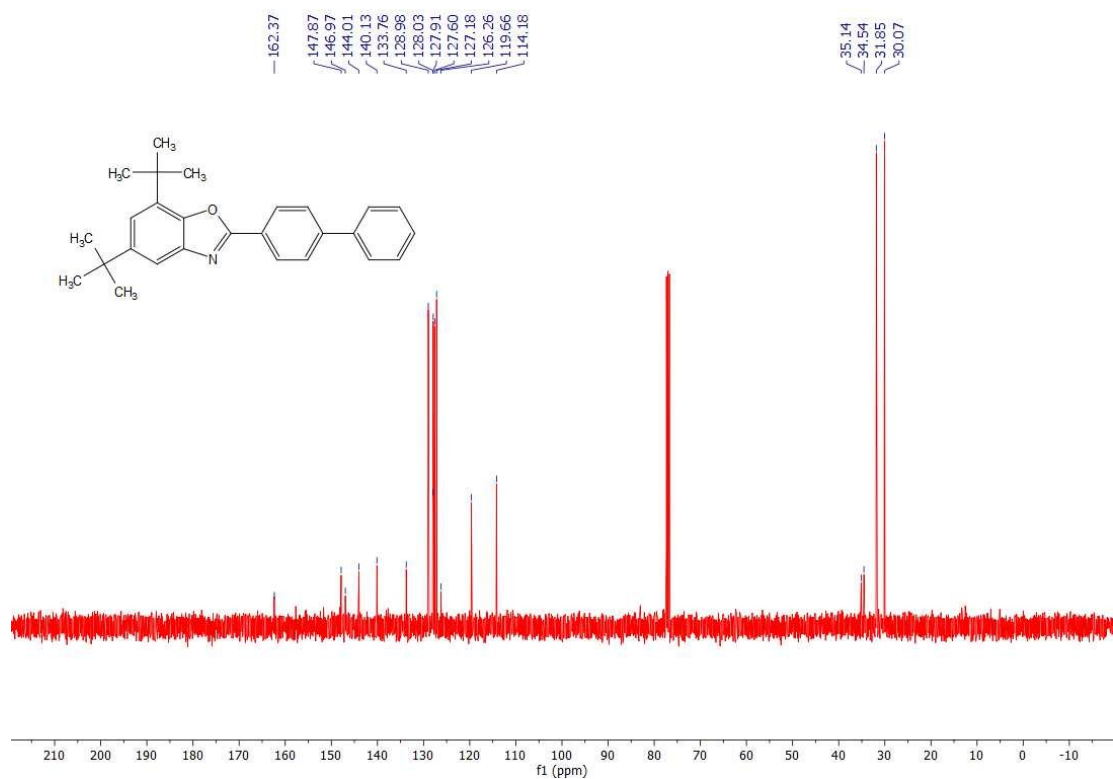

Figure S18. <sup>13</sup>C NMR spectrum of 2-([1,1'-biphenyl]-4-yl)-5,7-di-tert-butylbenzo[d]oxazole (4i) in CDCl<sub>3</sub> at 100 MHz.



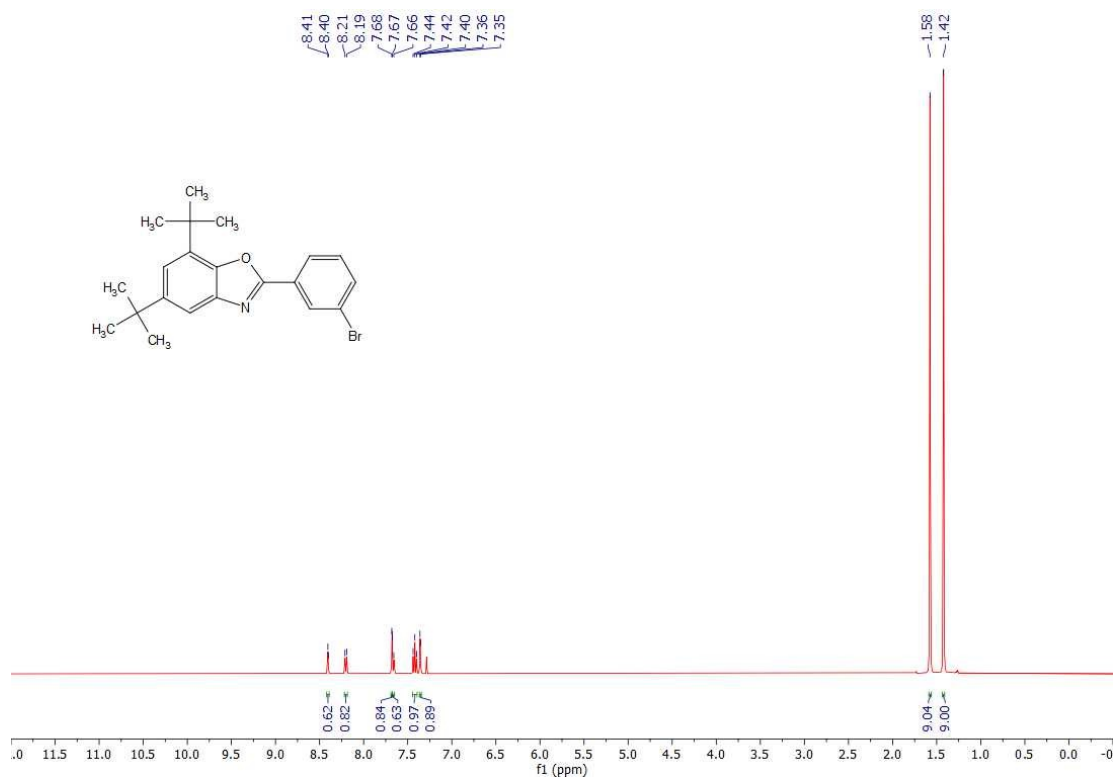

Figure S19. <sup>1</sup>H NMR spectrum of 2-(3-bromophenyl)-5,7-di-*tert*-butylbenzo[d]oxazole (4j) in CDCl<sub>3</sub> at 400 MHz.

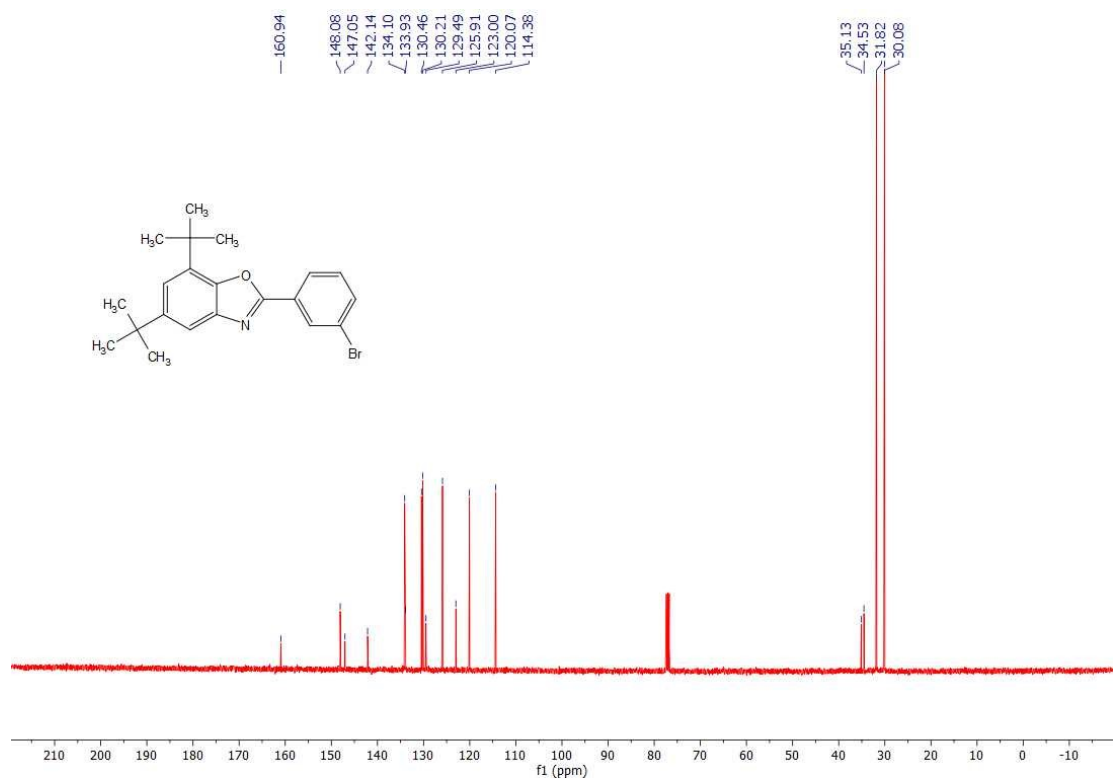

Figure S20. <sup>13</sup>C NMR spectrum of 2-(3-bromophenyl)-5,7-di-*tert*-butylbenzo[d]oxazole (4j) in CDCl<sub>3</sub> at 100 MHz.

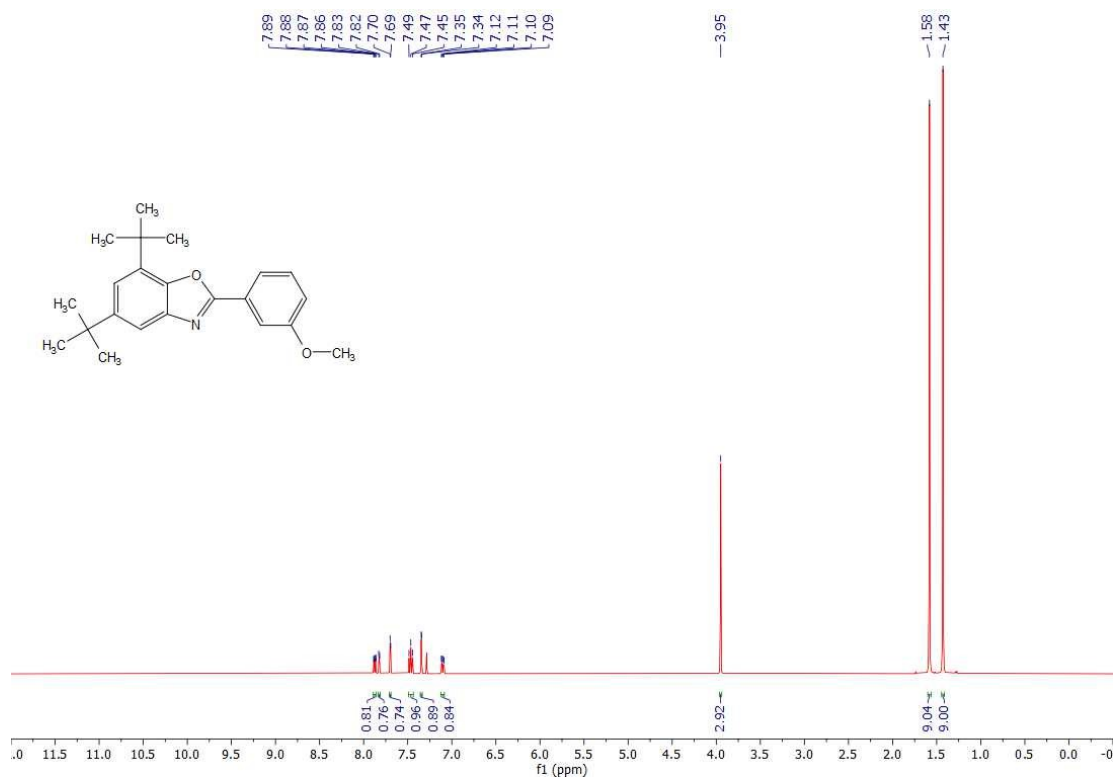

Figure S21. <sup>1</sup>H NMR spectrum of 5,7-di-*tert*-butyl-2-(3-methoxyphenyl)benzo[d]oxazole (4k) in CDCl<sub>3</sub> at 400 MHz.

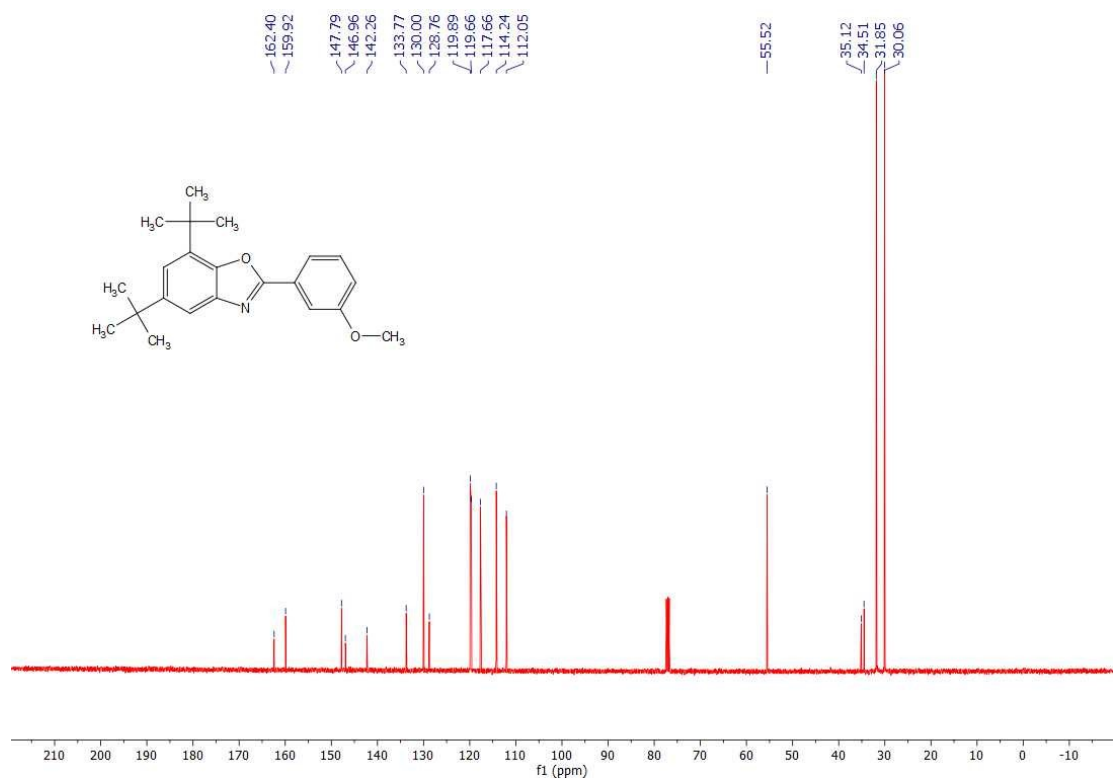

Figure S22. <sup>13</sup>C NMR spectrum of 5,7-di-*tert*-butyl-2-(3-methoxyphenyl)benzo[d]oxazole (4k) in CDCl<sub>3</sub> at 100 MHz.

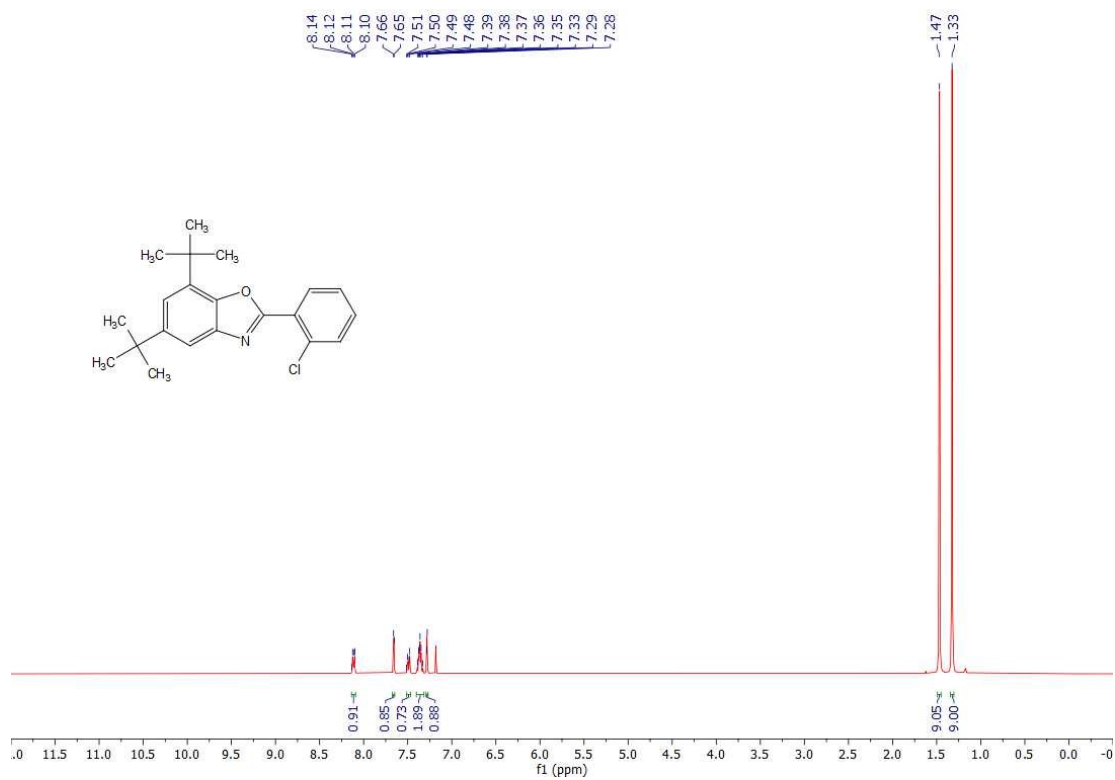

Figure S23. <sup>1</sup>H NMR spectrum of 5,7-di-*tert*-butyl-2-(2-chlorophenyl)benzo[d]oxazole (4I) in CDCl<sub>3</sub> at 400 MHz.

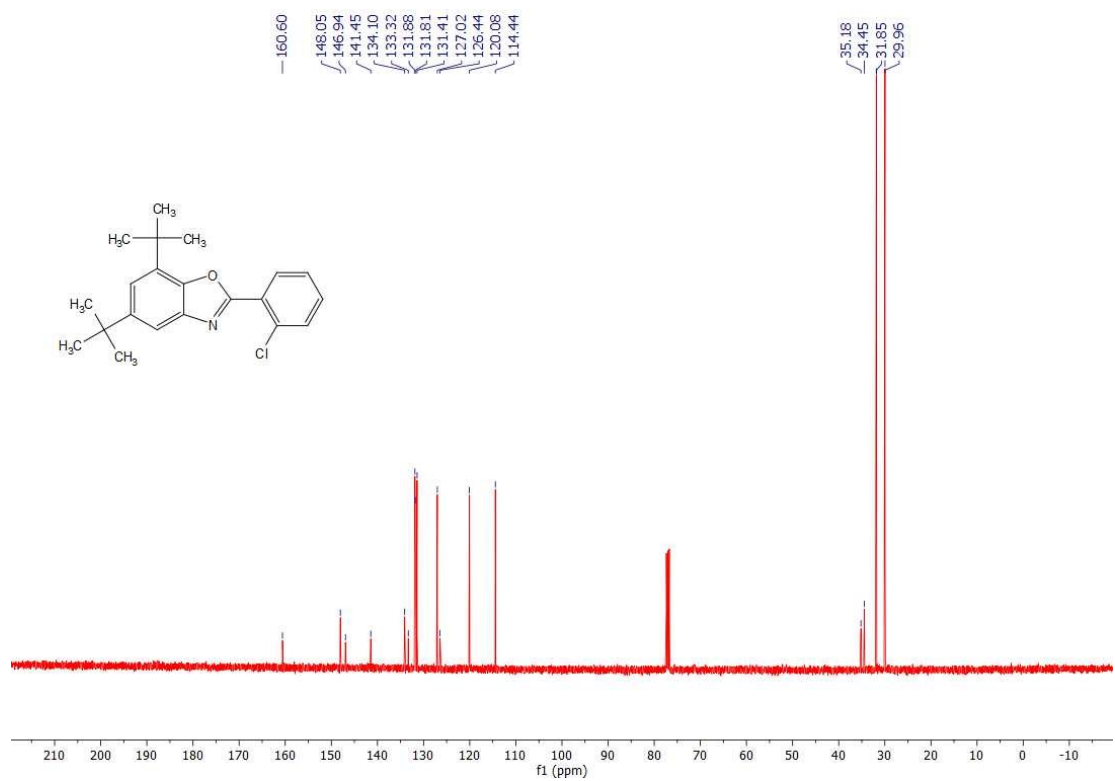

Figure S24. <sup>13</sup>C NMR spectrum of 5,7-di-*tert*-butyl-2-(2-chlorophenyl)benzo[d]oxazole (4I) in CDCl<sub>3</sub> at 100 MHz.

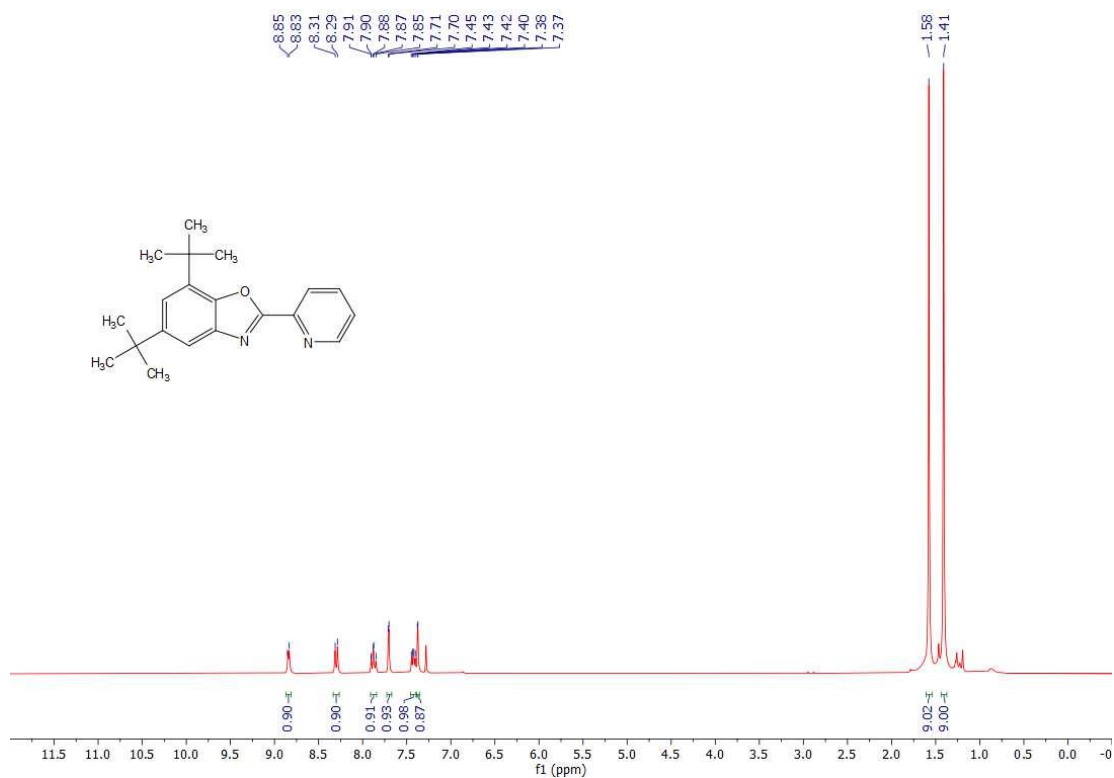

Figure S25. <sup>1</sup>H NMR spectrum of 5,7-di-tert-butyl-2-(pyridin-2-yl)benzo[d]oxazole (4m) CDCl<sub>3</sub> at 300 MHz.

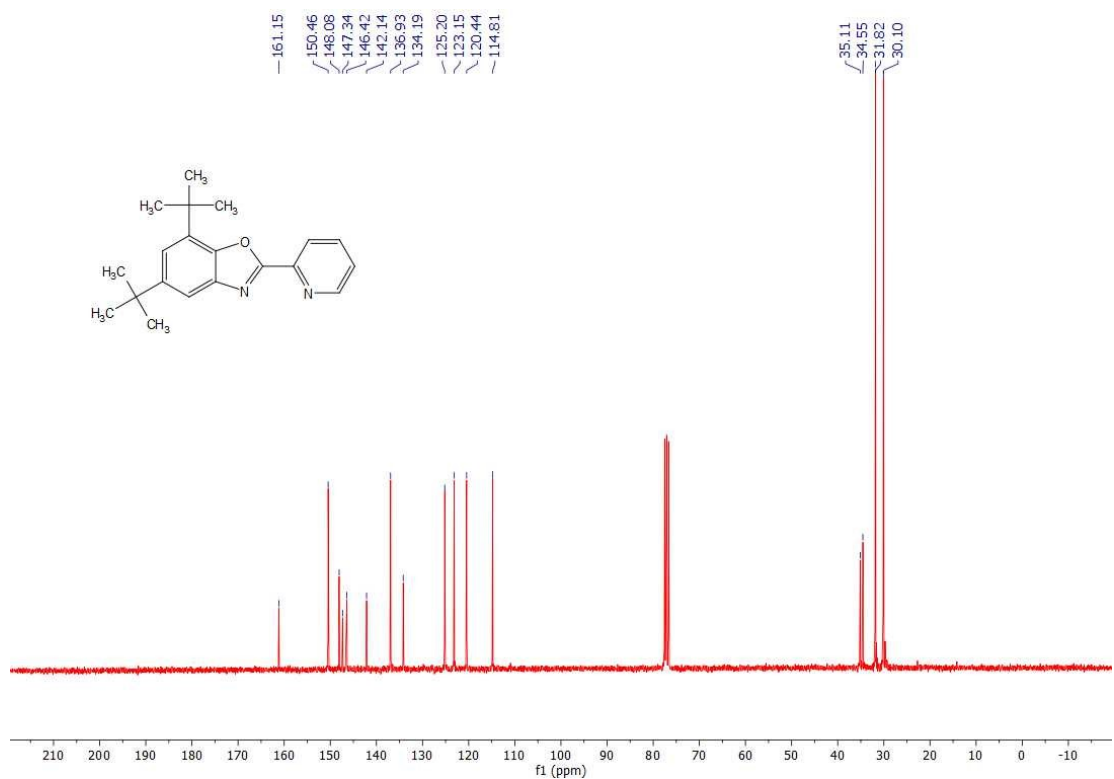

Figure S26. <sup>13</sup>C NMR spectrum of 5,7-di-tert-butyl-2-(pyridin-2-yl)benzo[d]oxazole (4m) in CDCl<sub>3</sub> at 75 MHz.

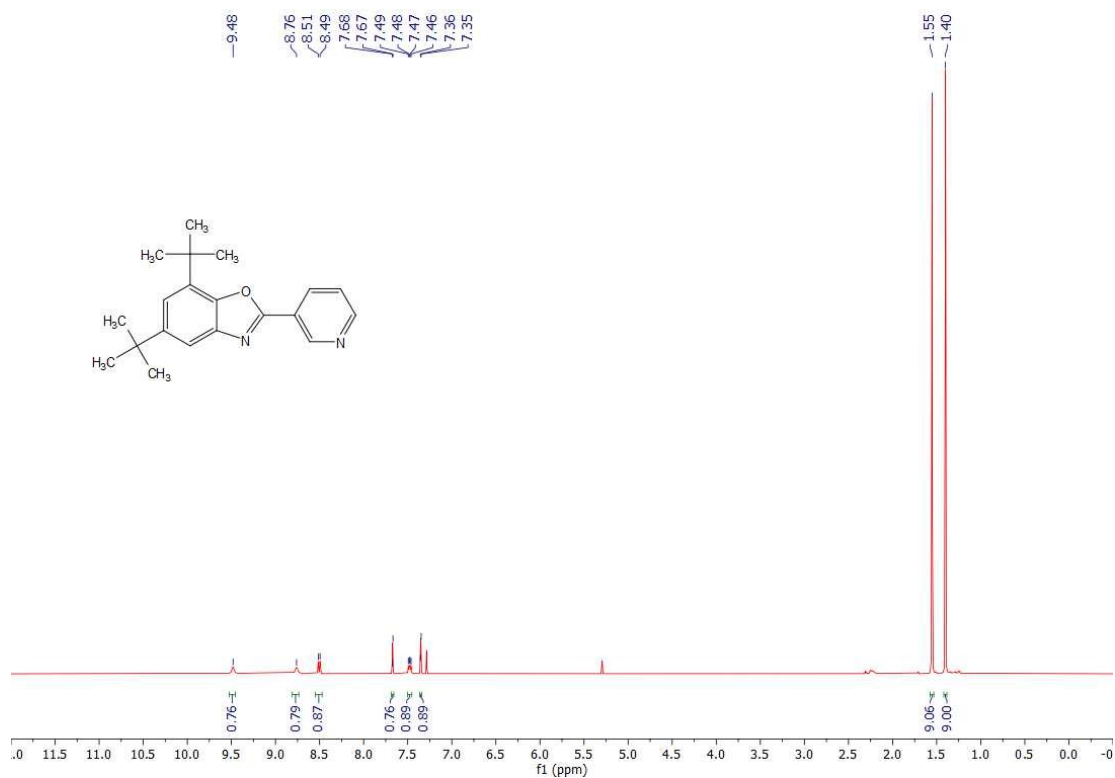

Figure S27. <sup>1</sup>H NMR spectrum of 5,7-di-*tert*-butyl-2-(pyridin-3-yl)benzo[d]oxazole (4n) CDCl<sub>3</sub> at 400 MHz.

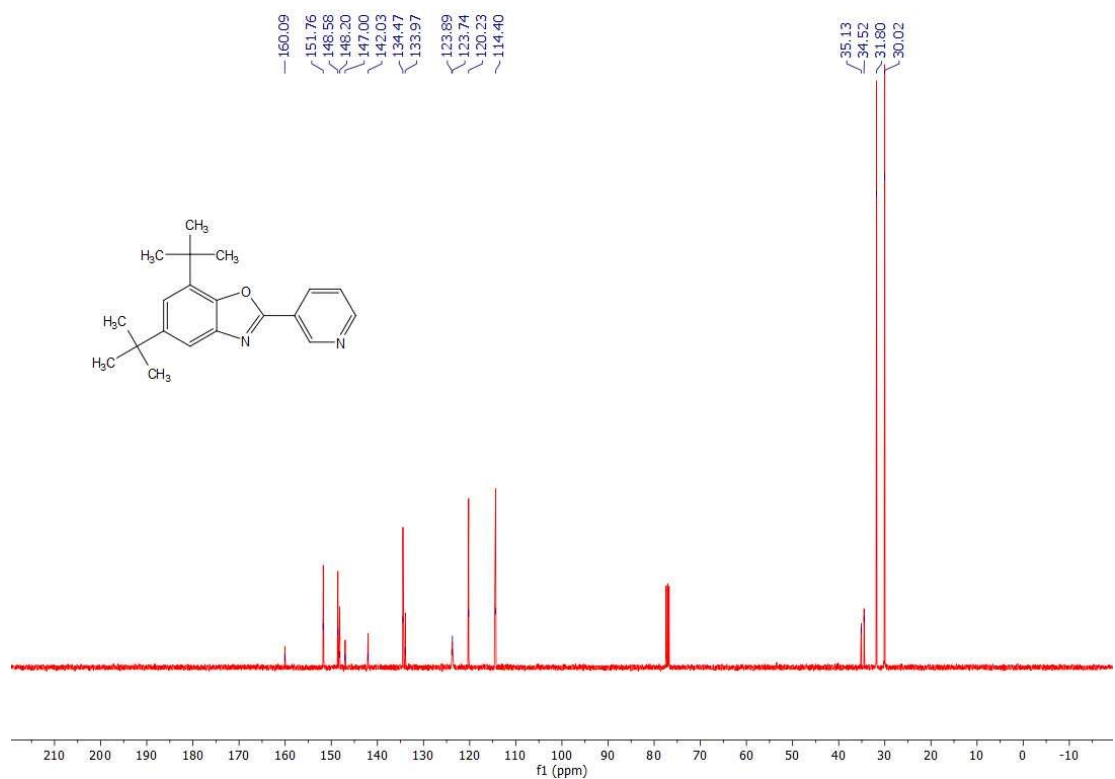

Figure S28. <sup>13</sup>C NMR spectrum of 5,7-di-*tert*-butyl-2-(pyridin-3-yl)benzo[d]oxazole (4n) in CDCl<sub>3</sub> at 100 MHz.

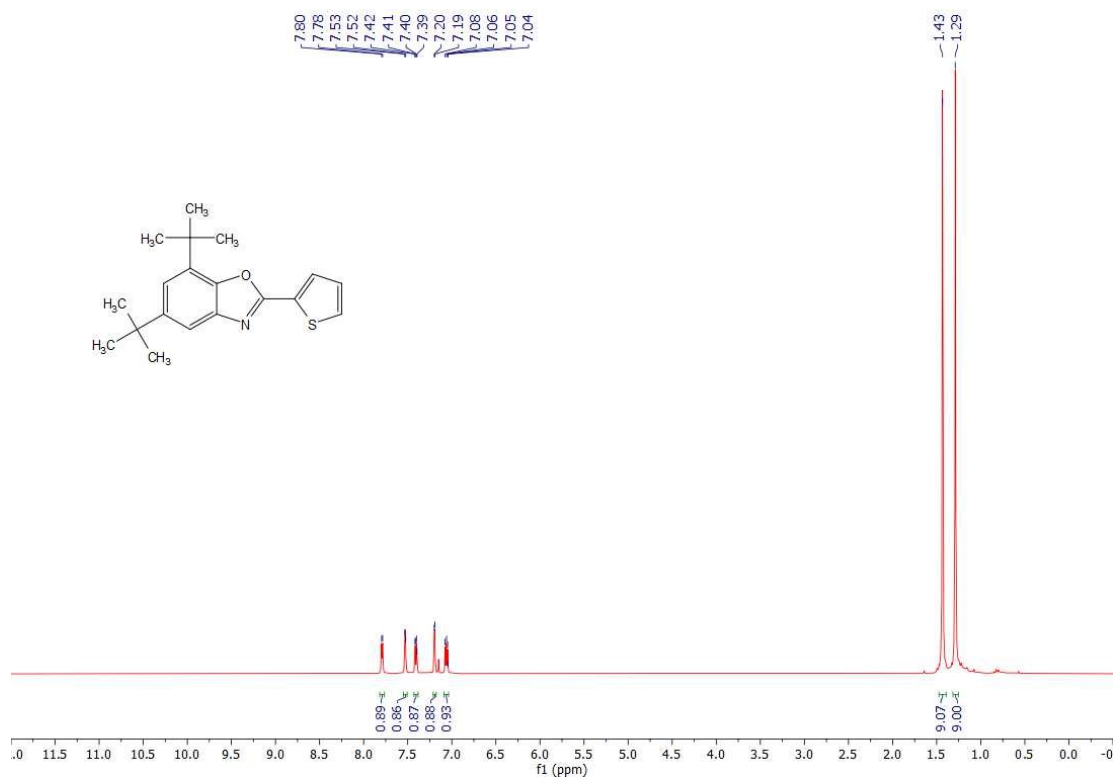

Figure S29. <sup>1</sup>H NMR spectrum of 5,7-di-*tert*-butyl-2-(thiophen-2-yl)benzo[d]oxazole (4o) in CDCl<sub>3</sub> at 300 MHz.

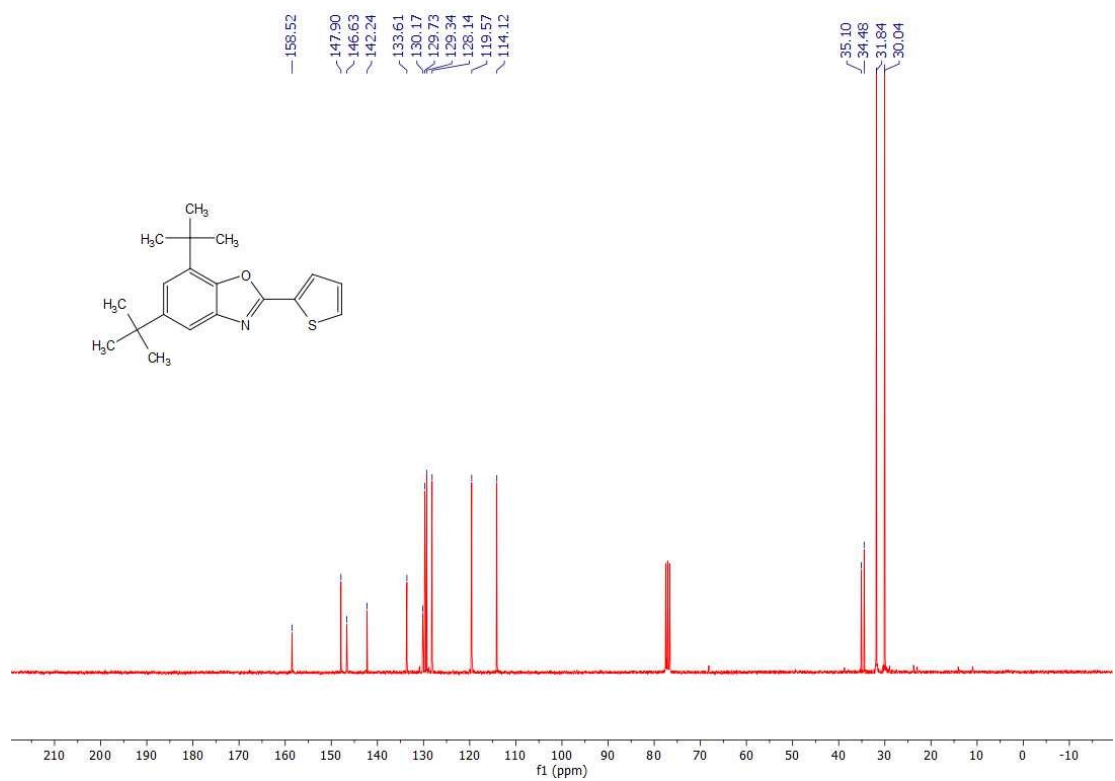

Figure S30. <sup>13</sup>C NMR spectrum of 5,7-di-*tert*-butyl-2-(thiophen-2-yl)benzo[d]oxazole (4o) in CDCl<sub>3</sub> at 75 MHz.

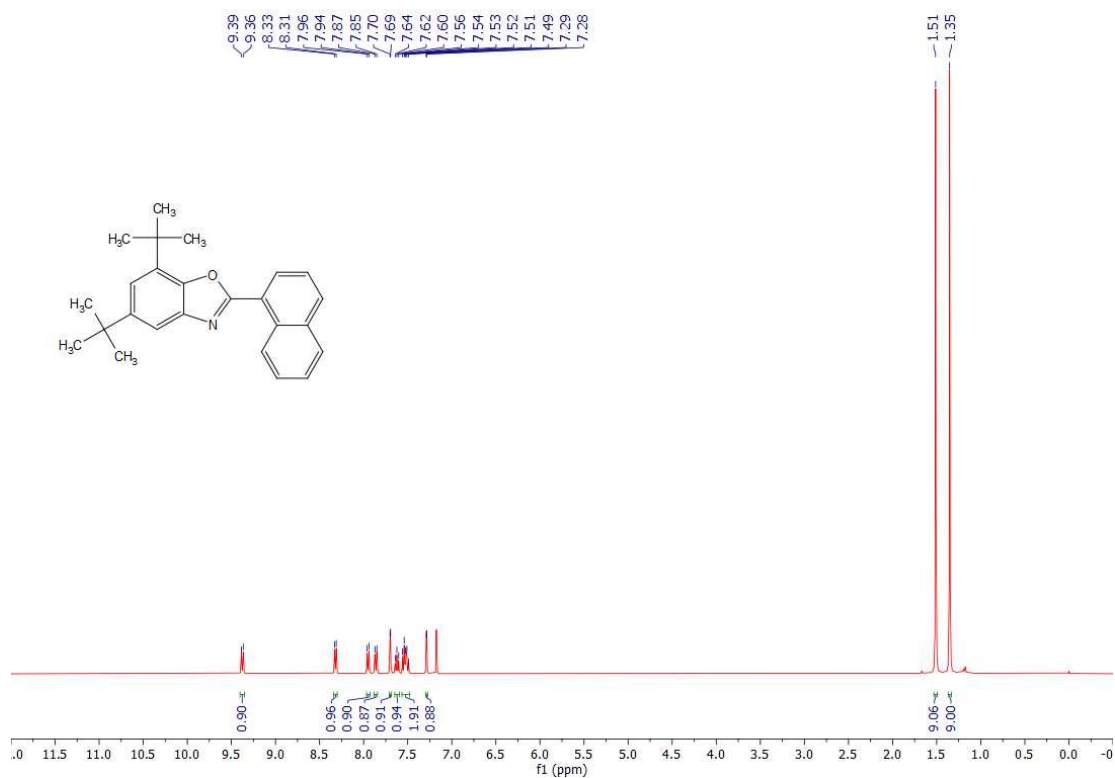

Figure S31. <sup>1</sup>H NMR spectrum of 5,7-di-*tert*-butyl-2-(naphthalen-1-yl)benzo[d]oxazole (4p) CDCl<sub>3</sub> at 400 MHz.

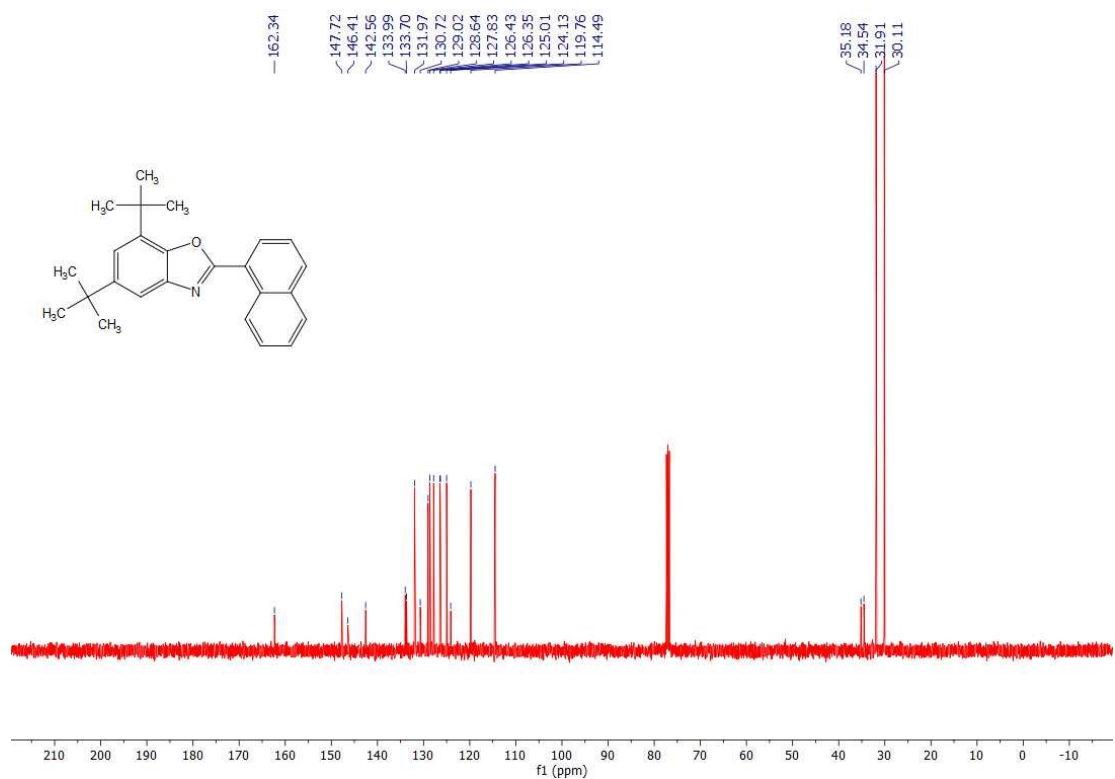

Figure S32. <sup>13</sup>C NMR spectrum of 5,7-di-*tert*-butyl-2-(naphthalen-1-yl)benzo[d]oxazole (4p) in CDCl<sub>3</sub> at 100 MHz.

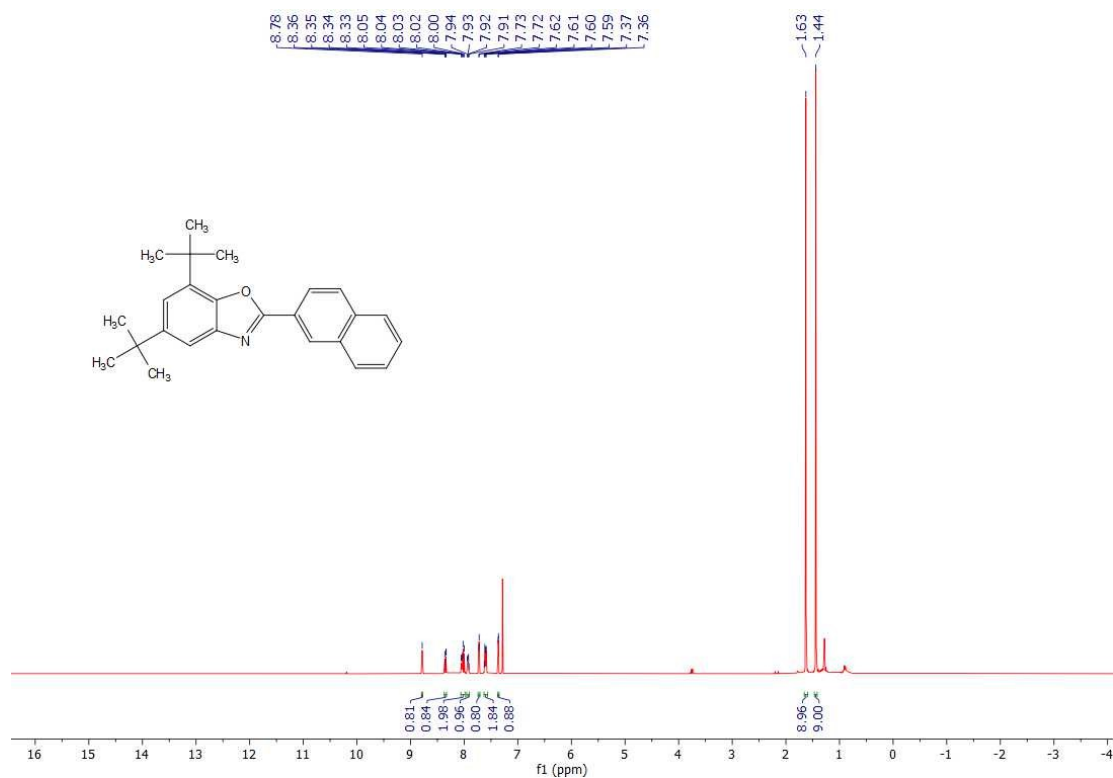

Figure S33. <sup>1</sup>H NMR spectrum of 5,7-di-tert-butyl-2-(naphthalen-2-yl)benzo[d]oxazole (4q) in CDCl<sub>3</sub> at 400 MHz.

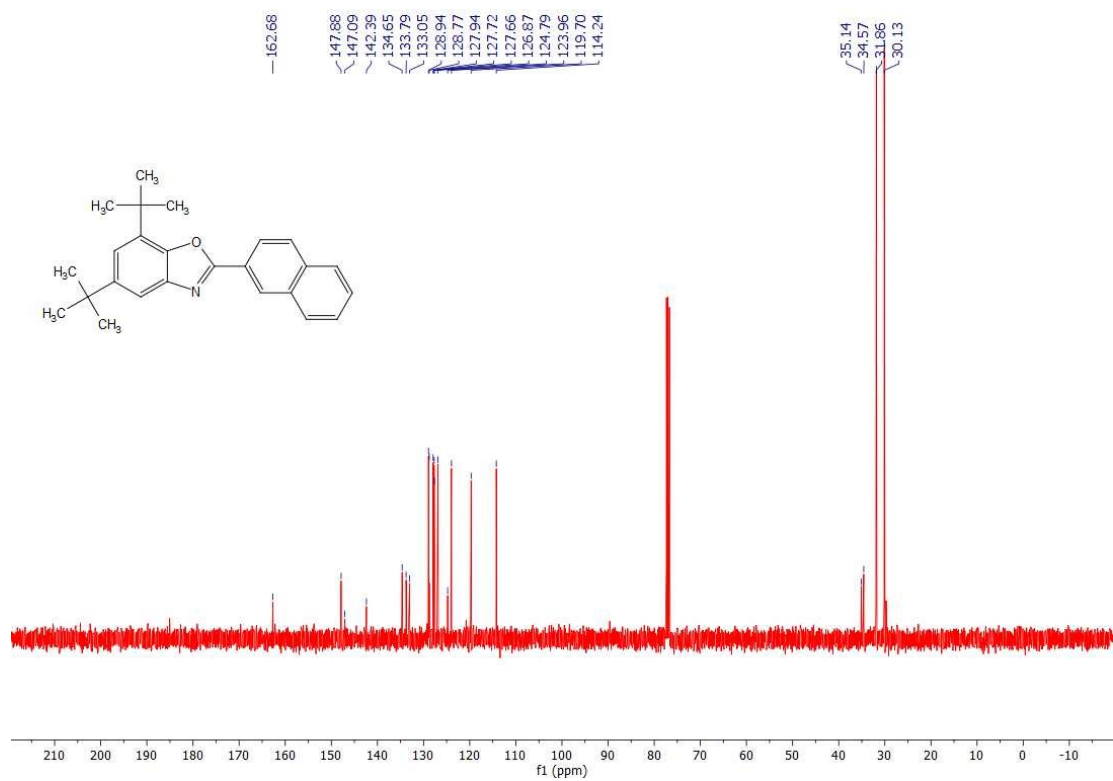

Figure S34. <sup>13</sup>C NMR spectrum of 5,7-di-tert-butyl-2-(naphthalen-2-yl)benzo[d]oxazole (4q) in CDCl<sub>3</sub> at 100 MHz.



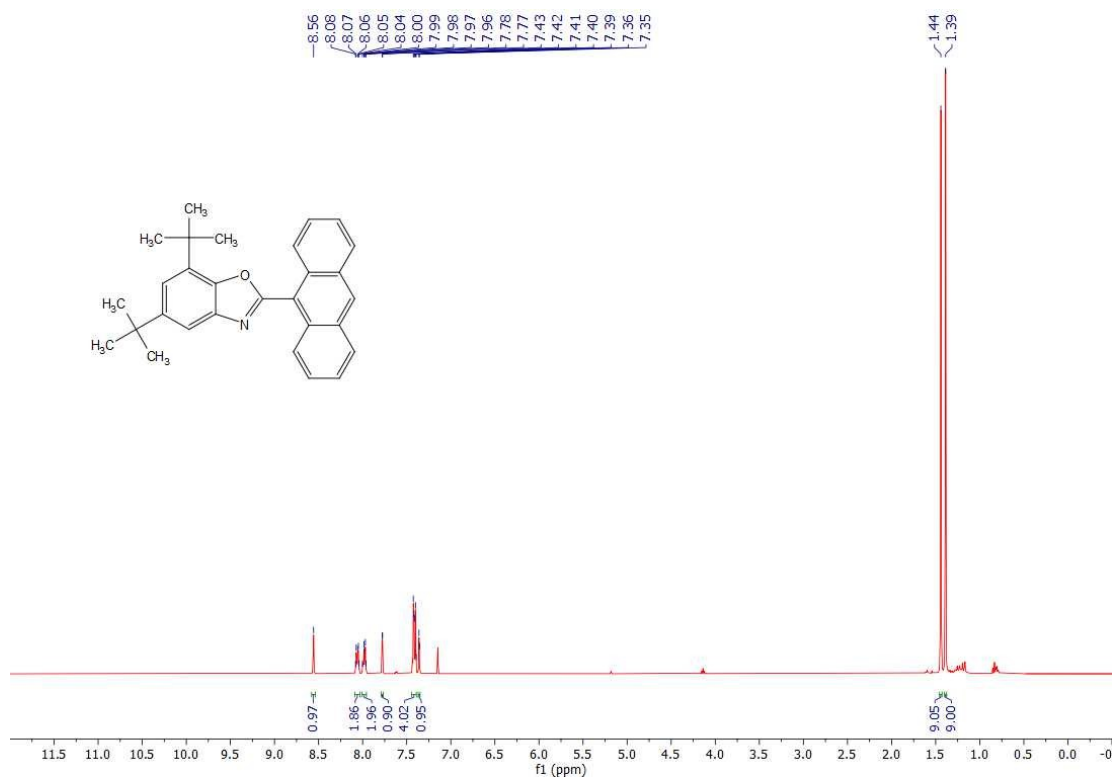

Figure S35. <sup>1</sup>H NMR spectrum of 2-(anthracen-9-yl)-5,7-di-*tert*-butylbenzo[d]oxazole (4r) in CDCl<sub>3</sub> at 400 MHz.

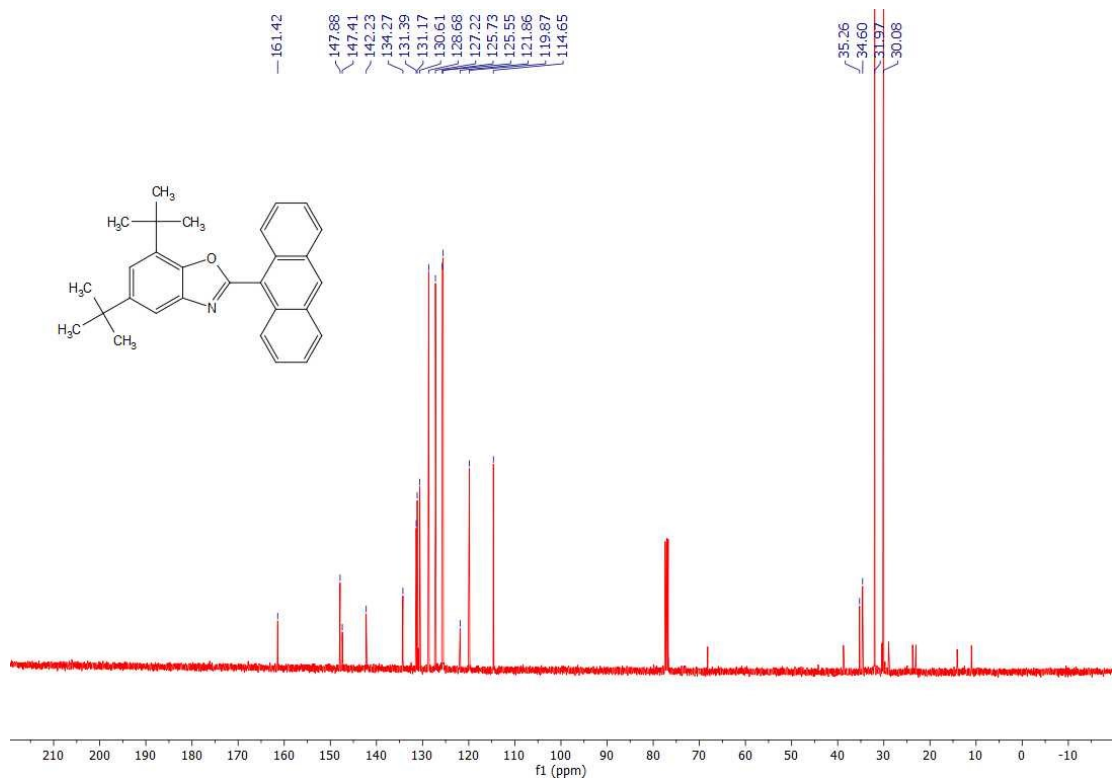

Figure S36. <sup>13</sup>C NMR spectrum of 2-(anthracen-9-yl)-5,7-di-*tert*-butylbenzo[d]oxazole (4r) in CDCl<sub>3</sub> at 100 MHz.

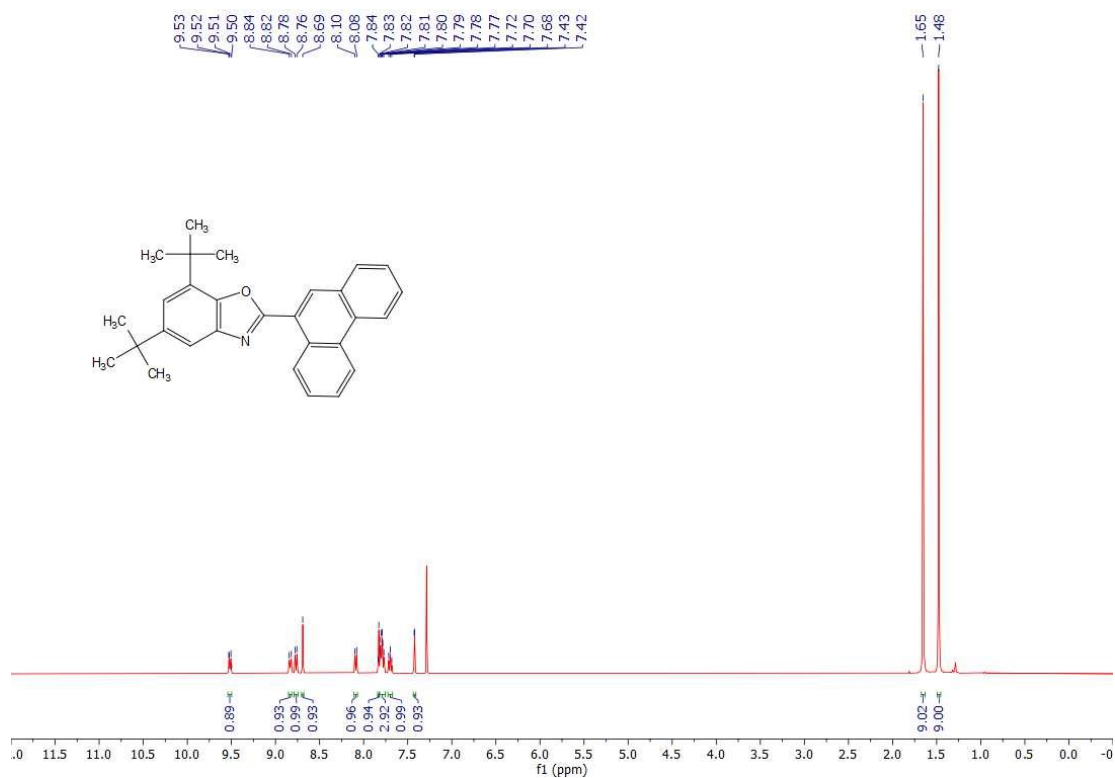

Figure S37. <sup>1</sup>H NMR spectrum of 5,7-di-*tert*-butyl-2-(phenanthren-9-yl)benzo[d]oxazole (4s) in CDCl<sub>3</sub> at 400 MHz.

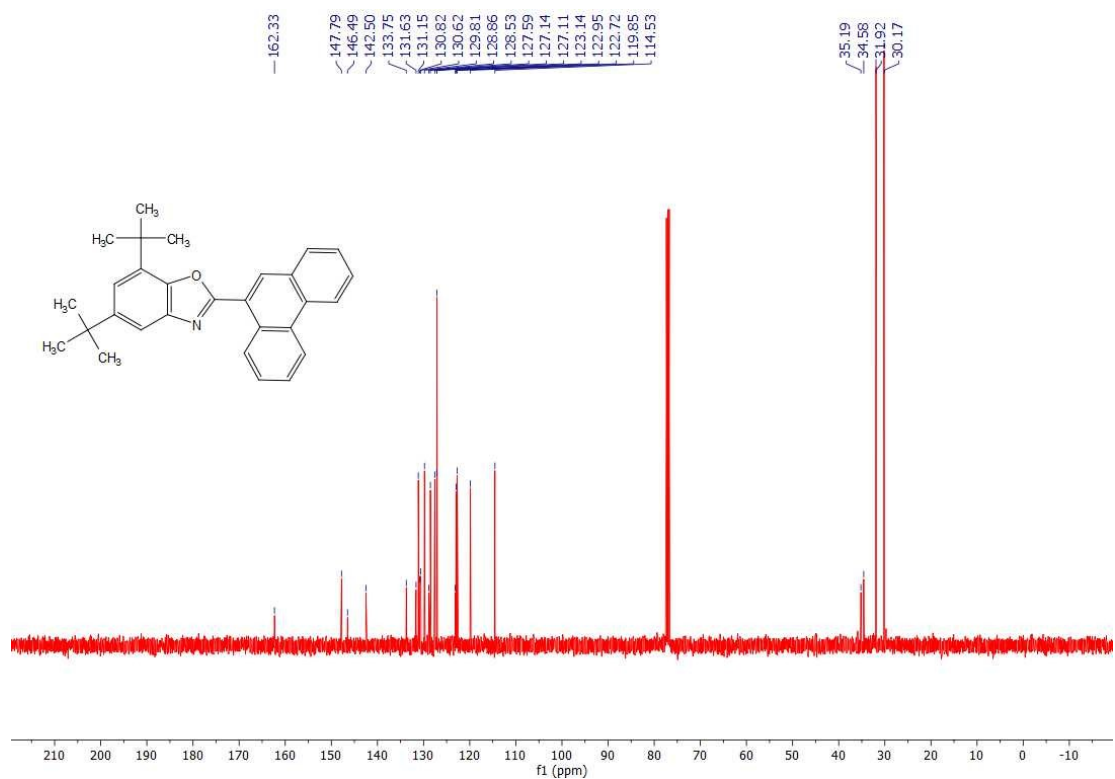

Figure S38. <sup>13</sup>C NMR spectrum of 5,7-di-*tert*-butyl-2-(phenanthren-9-yl)benzo[d]oxazole (4s) in CDCl<sub>3</sub> at 100 MHz.

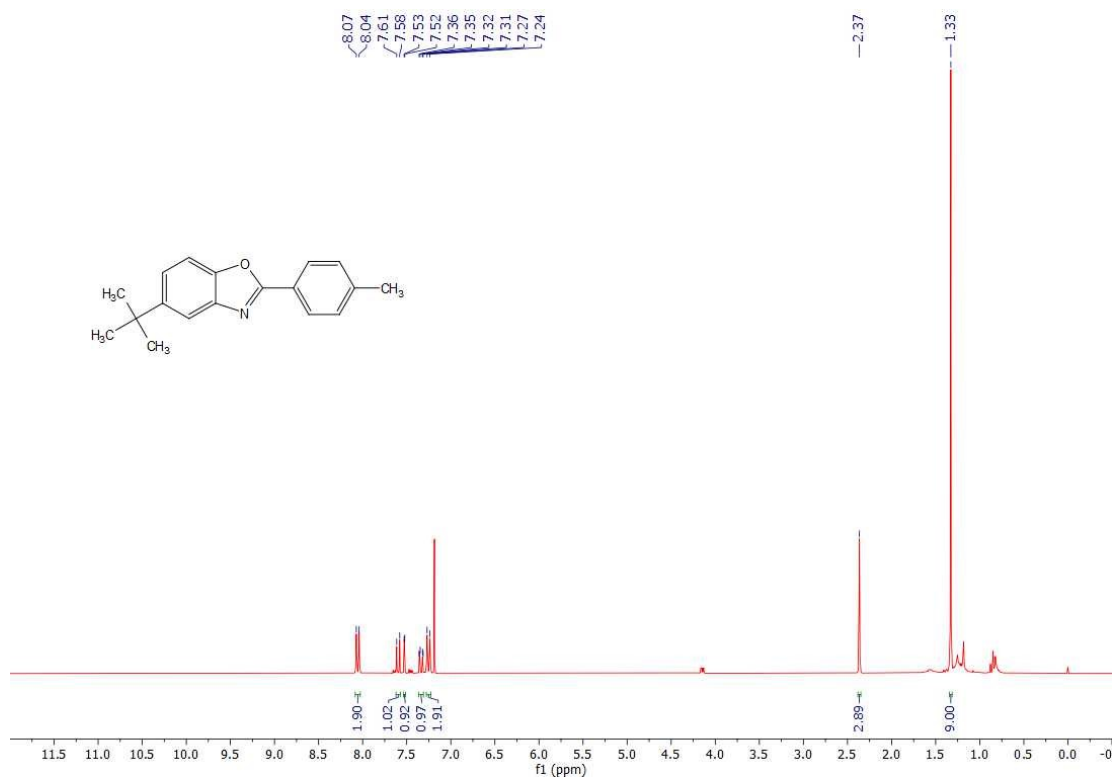

Figure S39. <sup>1</sup>H NMR spectrum of 5-(*tert*-butyl)-2-(*p*-tolyl)benzo[*d*]oxazole (4t) in CDCl<sub>3</sub> at 400 MHz.

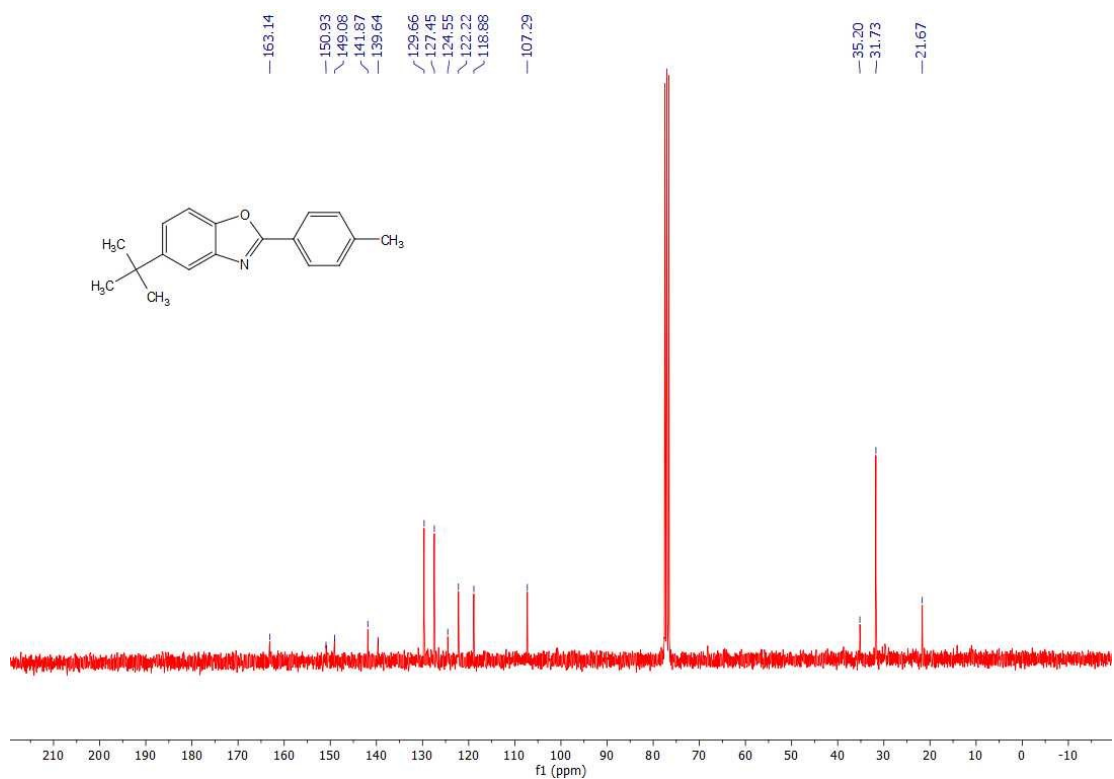

Figure S40. <sup>13</sup>C NMR spectrum of 5-(*tert*-butyl)-2-(*p*-tolyl)benzo[*d*]oxazole (4t) in CDCl<sub>3</sub> at 75 MHz.

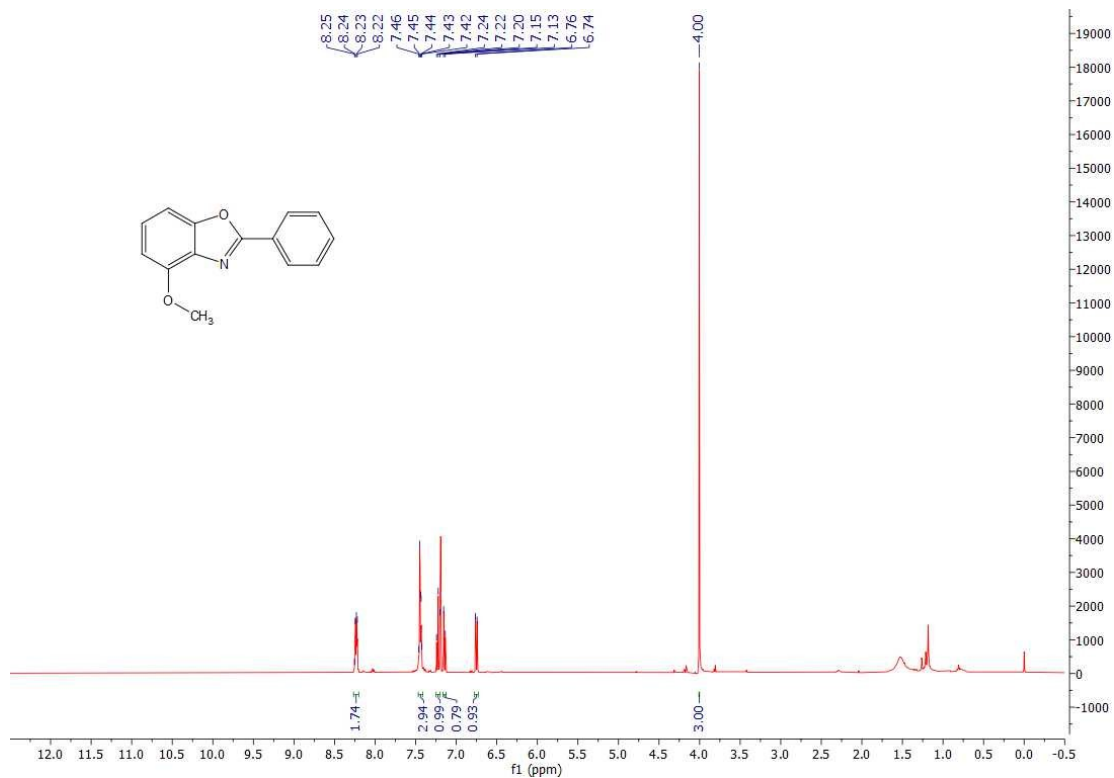

Figure S41.  $^1\text{H}$  NMR spectrum of 4-methoxy-2-phenylbenzo[d]oxazole (4w) in  $\text{CDCl}_3$  at 400 MHz.

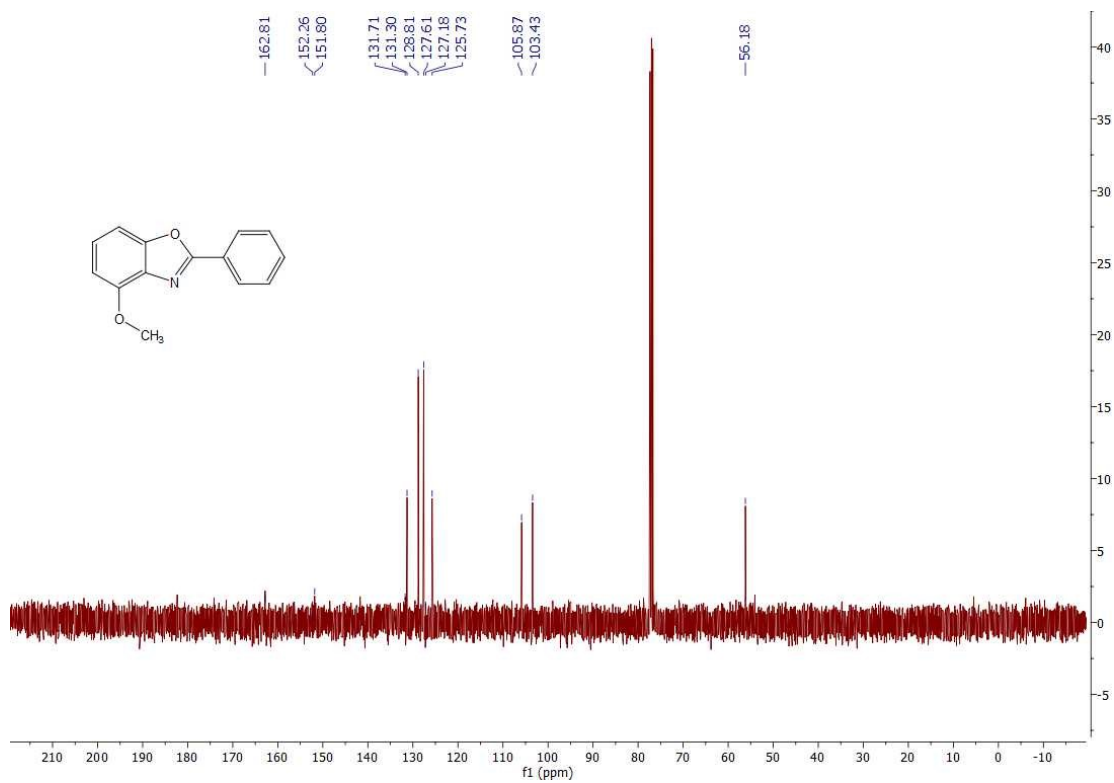

Figure S42.  $^{13}\text{C}$  NMR spectrum of 4-methoxy-2-phenylbenzo[d]oxazole (4w) in  $\text{CDCl}_3$  at 100 MHz.

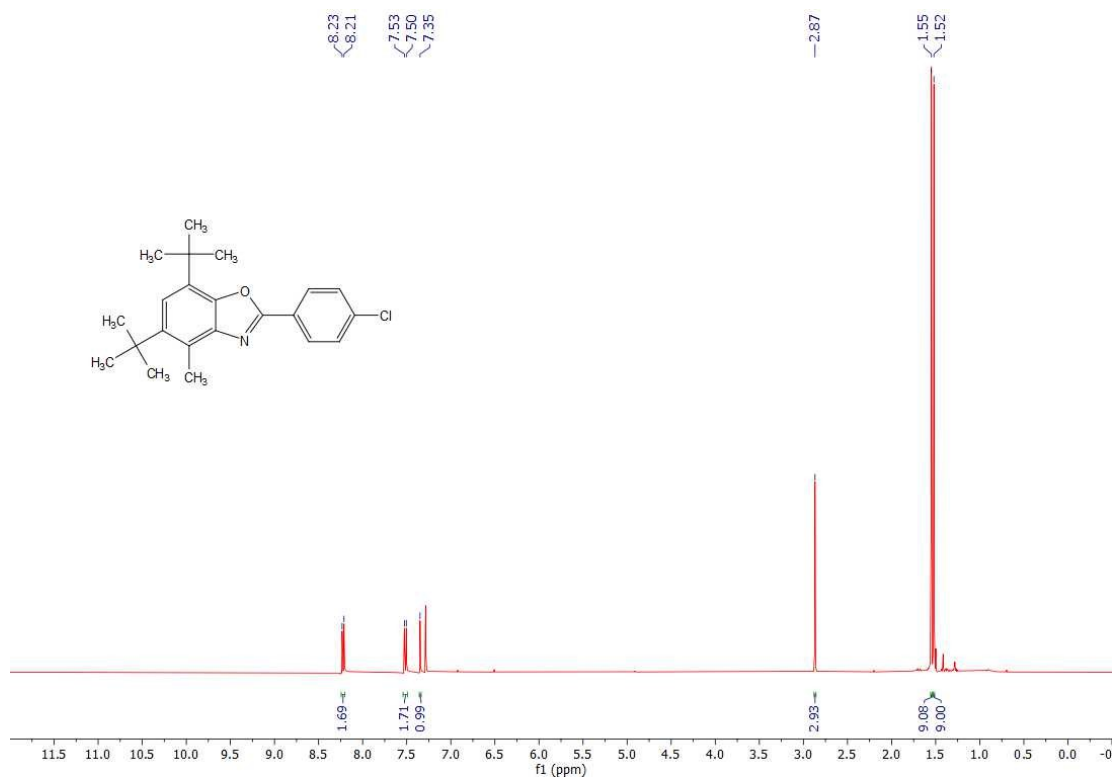

Figure S43. <sup>1</sup>H NMR spectrum of 5,7-di-*tert*-butyl-2-(4-chlorophenyl)-4-methylbenzo[*d*]oxazole (4x) in CDCl<sub>3</sub> at 400 MHz.

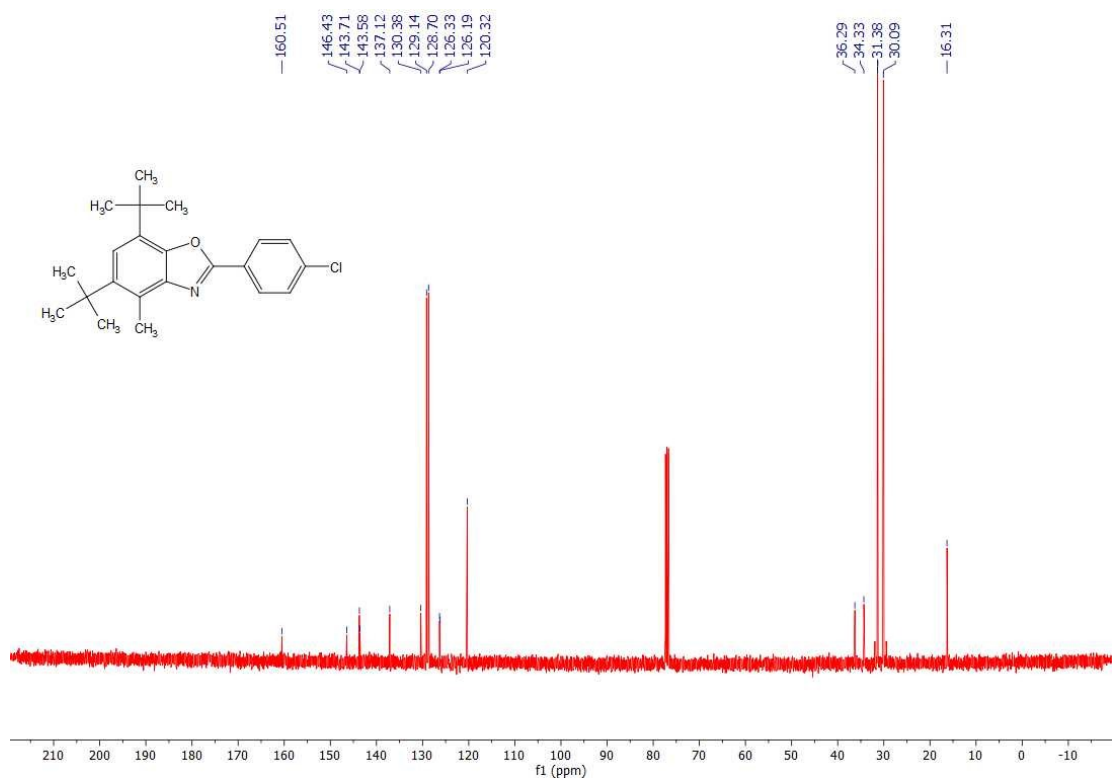

Figure S44. <sup>13</sup>C NMR spectrum of 5,7-di-*tert*-butyl-2-(4-chlorophenyl)-4-methylbenzo[*d*]oxazole (4x) in CDCl<sub>3</sub> at 100 MHz.

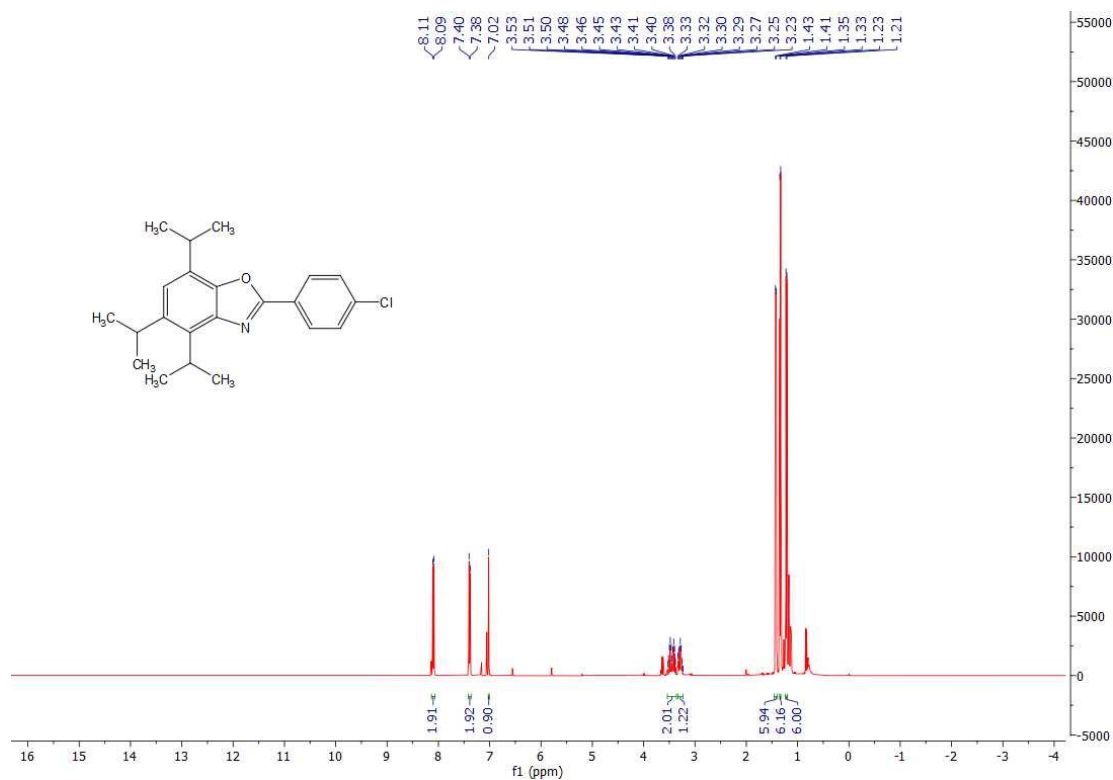

Figure S45. <sup>1</sup>H NMR spectrum of 2-(4-chlorophenyl)-4,5,7-triisopropylbenzo[d]oxazole (4z) in CDCl<sub>3</sub> at 400 MHz.

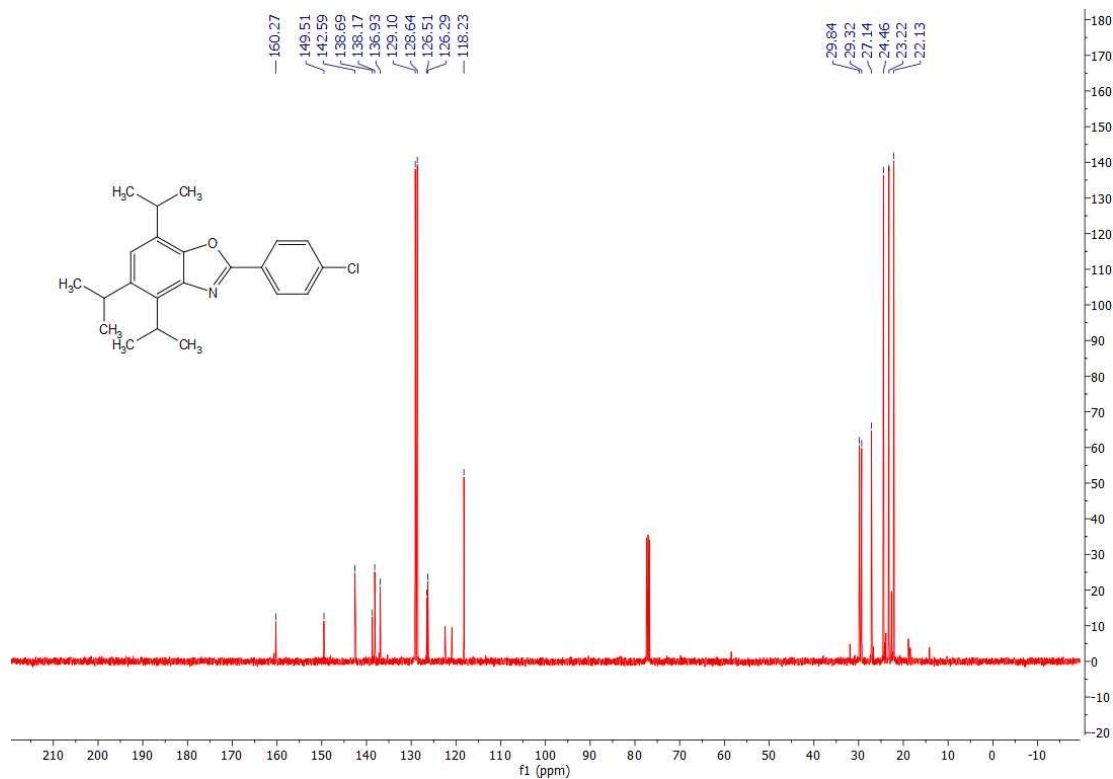

Figure S46. <sup>13</sup>C NMR spectrum of 2-(4-chlorophenyl)-4,5,7-triisopropylbenzo[d]oxazole (4z) in CDCl<sub>3</sub> at 100 MHz.

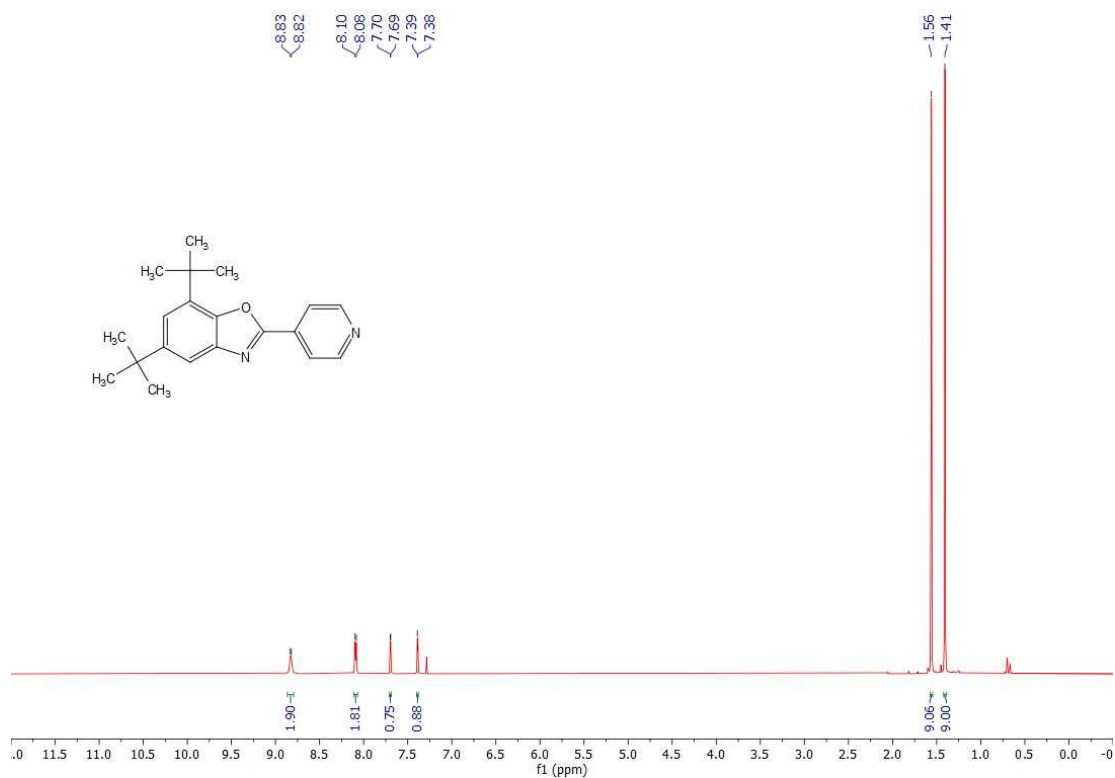

Figure S47.  $^1\text{H}$  NMR spectrum of 5,7-di-*tert*-butyl-2-(pyridin-4-yl)benzo[*d*]oxazole (4aa) in  $\text{CDCl}_3$  at 400 MHz.

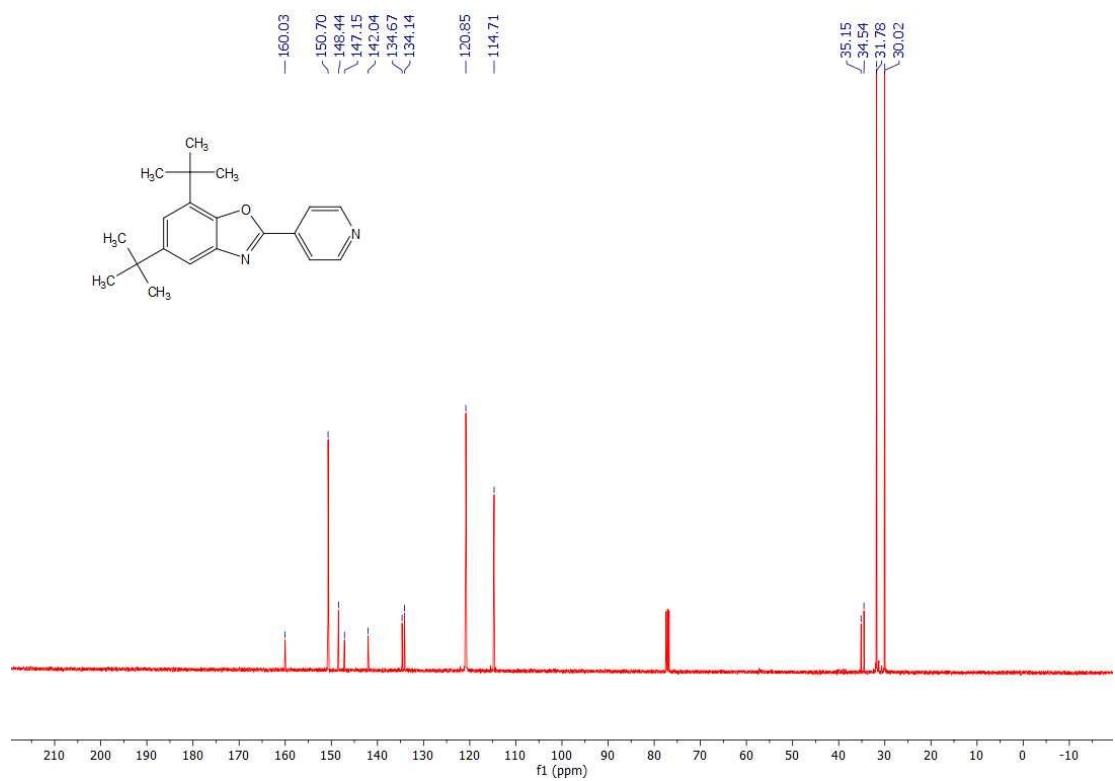

Figure S48.  $^{13}\text{C}$  NMR spectrum of 5,7-di-*tert*-butyl-2-(pyridin-4-yl)benzo[*d*]oxazole (4aa) in  $\text{CDCl}_3$  at 100 MHz.

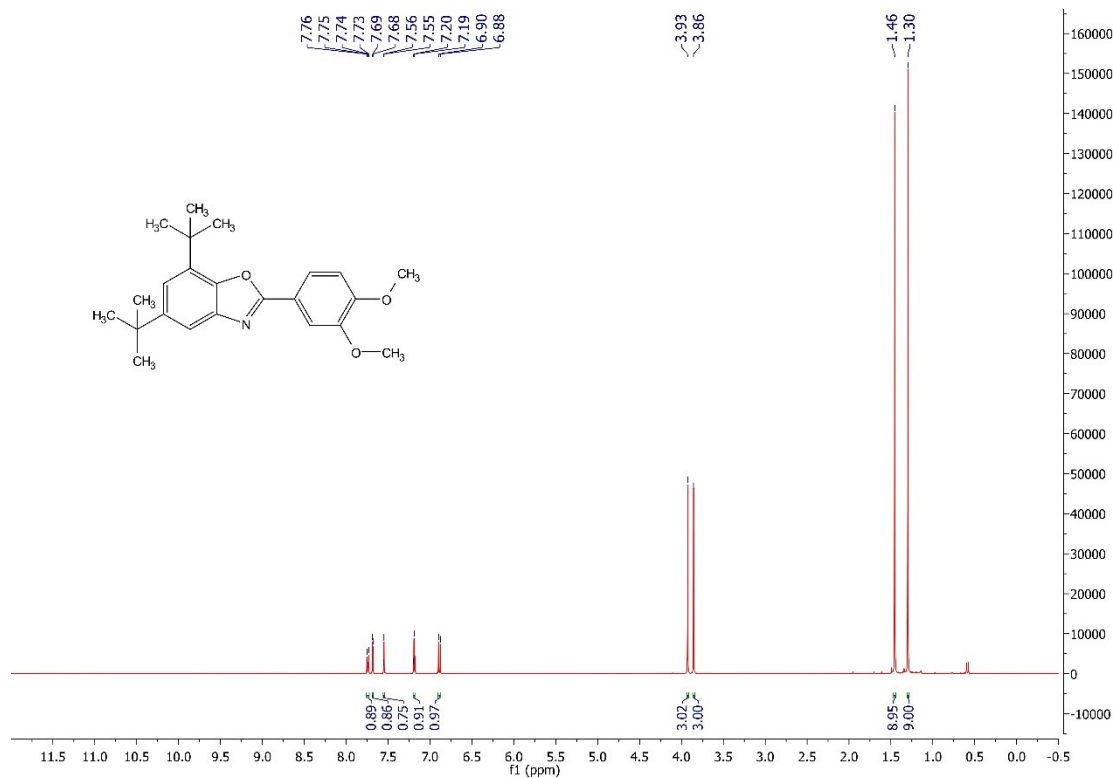

Figure S49. <sup>1</sup>H NMR spectrum of 5,7-di-tert-butyl-2-(3,4-dimethoxyphenyl)benzo[d]oxazole (4ab) in CDCl<sub>3</sub> at 400 MHz.

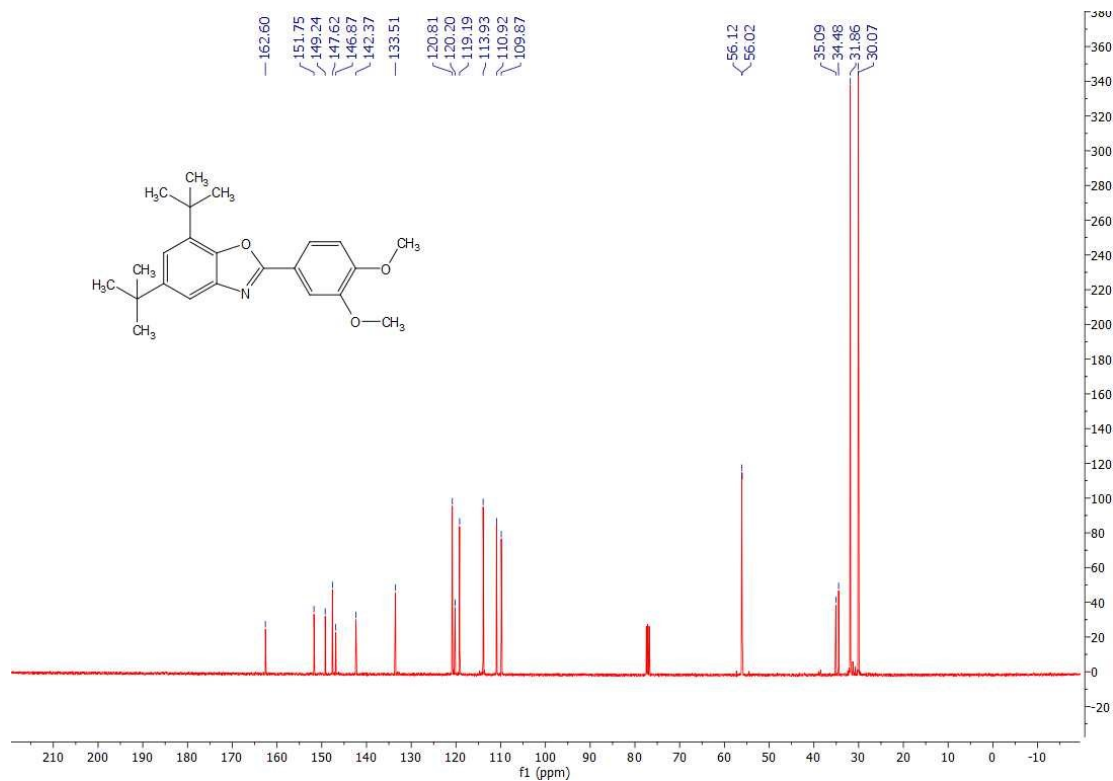

Figure S50. <sup>13</sup>C NMR spectrum of 5,7-di-tert-butyl-2-(3,4-dimethoxyphenyl)benzo[d]oxazole (4ab) in CDCl<sub>3</sub> at 100 MHz.



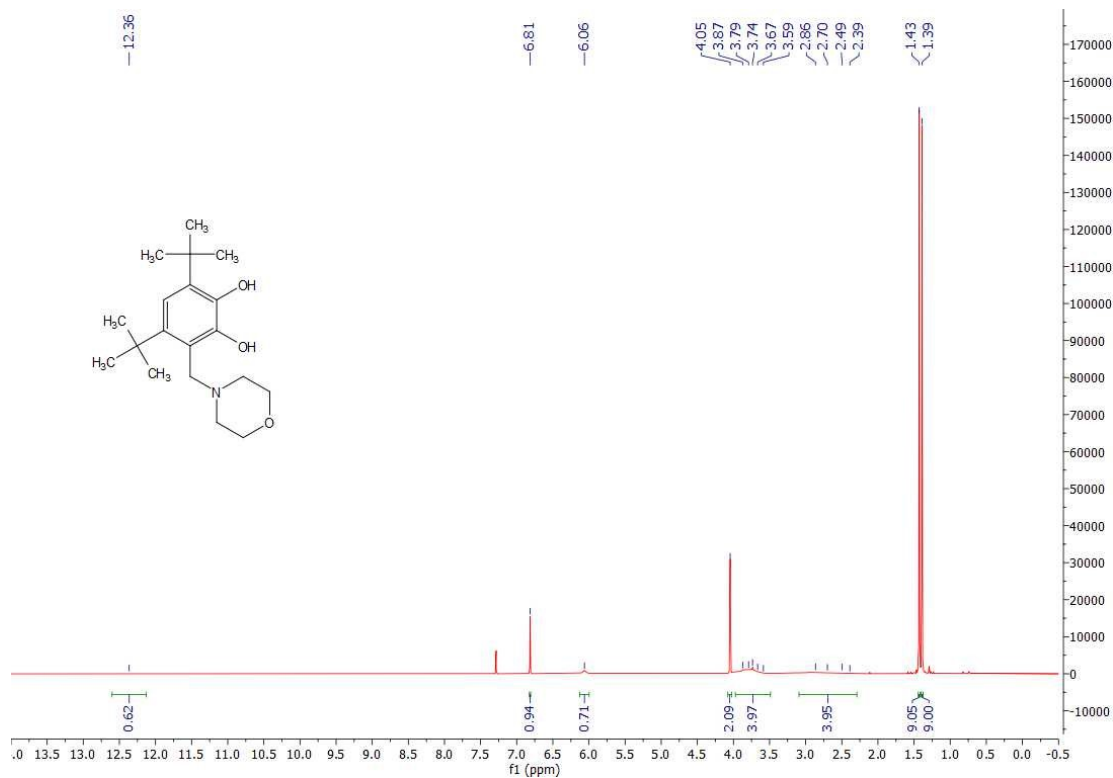

Figure S51. <sup>1</sup>H NMR spectrum of 4,6-di-tert-butyl-3-morpholinobenzene-1,2-diol (1g) in CDCl<sub>3</sub> at 400 MHz.

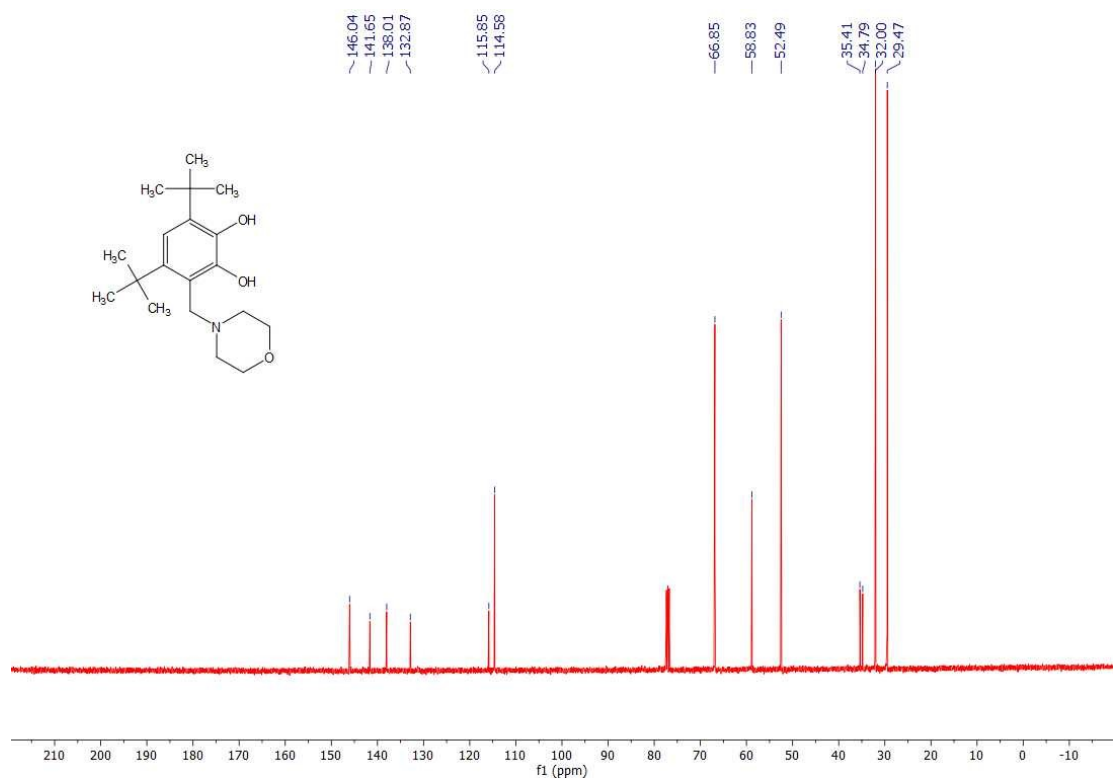

Figure S52. <sup>13</sup>C NMR spectrum of 4,6-di-tert-butyl-3-morpholinobenzene-1,2-diol (1g) in CDCl<sub>3</sub> at 100 MHz.
